# Supplementary material for: Divergent [{ONNN}Mg–Cl] complexes in highly active and living lactide polymerization
Source: PubMed Central journal article supplement — Chem Sci. 2017 May 26;8(8):5476–81. doi: 10.1039/c7sc01514c (PMC5613742; doi:10.1039/c7sc01514c), 2017-05-26
Supplement: SC-008-C7SC01514C-s001.pdf [file SC-008-C7SC01514C-s001.pdf]

## Supplementary Information

### Divergent [{ONNN}Mg-Cl] complexes in the highly active and living lactide polymerization

Tomer Rosen,<sup>†</sup> Israel Goldberg,<sup>†</sup> Wanda Navarra<sup>‡</sup>, Vincenzo Venditto<sup>‡,\*</sup> and Moshe Kol<sup>†,\*</sup>

<sup>†</sup> The School of Chemistry, Tel Aviv University, Ramat Aviv, Tel Aviv 69987, Israel

<sup>‡</sup> Department of Chemistry and Biology A. Zambelli and INSTM Research Unit, University of Salerno, Via Giovanni Paolo II 132, I-84084 Fisciano, SA, Italy.

#### Table of Contents

|                                                                                                                                            |     |
|--------------------------------------------------------------------------------------------------------------------------------------------|-----|
| 1. General Information.....                                                                                                                | S2  |
| 2. Synthesis of Ligands Precursors.....                                                                                                    | S4  |
| 3. Synthesis of Magnesium Complexes.....                                                                                                   | S6  |
| 4. General Homo-Polymerization Procedure.....                                                                                              | S10 |
| 5. General Block-Copolymerization Procedure.....                                                                                           | S10 |
| 6. Fig. S-1 – S-6 ( <sup>1</sup> H and <sup>13</sup> C NMR of Lig <sup>1,4-5</sup> H) .....                                                | S11 |
| 7. Fig. S-7 – S-16 ( <sup>1</sup> H and <sup>13</sup> C NMR of Magnesium complexes) .....                                                  | S14 |
| 8. Fig. S-17 – S-20 (2D NMR of [( $\mu$ -Lig <sup>1</sup> )Mg-Cl] <sub>2</sub> and [( $\mu$ -Lig <sup>2</sup> )Mg-Cl] <sub>2</sub> ) ..... | S19 |
| 9. Fig. S21 (Crystallographic structure of [( $\mu$ -Lig <sup>2</sup> )Mg-Cl] <sub>2</sub> ) .....                                         | S21 |
| 10. Polymerization Results .....                                                                                                           | S22 |
| 11. Fig. S-22 – S-29 ( <sup>1</sup> H HD-NMR and <sup>13</sup> C NMR of PLA Samples) .....                                                 | S24 |
| 12. Thermal and WAXD Analysis of PLA Samples .....                                                                                         | S28 |
| 13. References.....                                                                                                                        | S34 |

## General Information

All reactions with air- and/or water sensitive compounds were carried out using standard Schlenk or glovebox techniques under dry N<sub>2</sub> atmosphere. Pentane was washed with HNO<sub>3</sub>/H<sub>2</sub>SO<sub>4</sub> prior to distillation from Na/benzophenone/tetraglyme. Toluene was refluxed over Na and distilled. Dichloromethane was refluxed over CaH<sub>2</sub> and distilled. Benzyl magnesium chloride solution (1M in ether), anhydrous benzyl alcohol and salicylaldehyde were purchased from Aldrich and used as received. Bis(2-pyridylmethyl)amine was purchased from TCI and used as received. Sodium triacetoxyborohydride was purchased from Strem and used as received. L-lactide and D-lactide were given as gift from Purac (Corbion), and were purified by crystallization from dry toluene and sublimation. 3-Adamantyl-5-methylsalicylaldehyde, 3,5-bis(dimethylbenzyl)salicylaldehyde and the ligand precursors Lig<sup>2,3</sup>H were synthesized following previously published procedures.<sup>S1</sup> Deuterated chloroform was purchased from Cambridge Isotope Laboratories, Inc., degassed, and dried over activated 4A molecular sieves prior to use.

The NMR spectra were recorded on a Bruker Avance 500 spectrometer at 25 °C, unless otherwise stated. Chemical shifts ( $\delta$ ) are listed as parts per million and coupling constants ( $J$ ) in Hertz. <sup>1</sup>H NMR spectra are referenced using the residual solvent peak at  $\delta = 7.26$  for CDCl<sub>3</sub>. <sup>13</sup>C NMR spectra are referenced using the residual solvent peak at  $\delta = 77.16$  for CDCl<sub>3</sub>. The <sup>13</sup>C NMR spectra of PLA samples (10% CDCl<sub>3</sub> solution) were acquired using recycle delay of 10s. At least 2000 scans were averaged.

The molecular weights ( $M_n$  and  $M_w$ ) and the molecular mass distributions ( $M_w/M_n$ ) of the PLA samples were measured by gel permeation chromatography (GPC) at 30 °C, using THF as solvent, a flow rate of eluent of 1 mL/min, and narrow MW polystyrene standards as reference. The measurements were performed on a Jasco system equipped with an RI 1530 detector. A correction factor of 0.58 was employed for the molecular weight of PLA relative to polystyrene. THF-insoluble PLA samples were measured using chloroform as solvent at 30 °C with a flow rate of eluent of 0.8 mL/min.

High resolution MS was obtained on SYNAPT (Waters) spectrometer. Ionization methods: APPI (positive or negative) and ESI (positive or negative). Air-sensitive compounds were injected under N<sub>2</sub> stream.

Wide-angle X-ray diffraction (WAXD) measurements of single crystal were performed on an ApexDuo (Bruker-AXS) diffractometer system, using MoK $\alpha$ ( $\lambda = 0.7107 \text{ \AA}$ ) radiation. The analyzed crystals were embedded within a drop of viscous oil and freeze-cooled to ca. 110 K.

WAXD patterns of powder samples were obtained by an automatic Bruker D8 Advance diffractometer, in reflection, by using the nickel filtered CuK $\alpha$  radiation ( $\lambda = 1.5418 \text{ \AA}$ ).

Differential scanning calorimetry analysis was performed on a TA Q2000 (TA Instruments) according to the following program: Equilibrate at -40°C; Ramp 10.00 °C/min to 240.00 °C; Isothermal for 3 min; Ramp 10.00 °C/min to -40.00 °C; Ramp 10.00 °C/min to 240.00 °C. Melting transitions were determined both on the first and second heating runs, with a nitrogen purge at a flow rate of 40 mL s<sup>-1</sup>. The instrument was calibrated for temperature and enthalpy by a high purity indium (156.60 °C, 28.45 J g<sup>-1</sup>) standard. DSC analyses were carried out on films obtained by casting from 1 wt % solutions, at room temperature, from dichloromethane ( $\geq 99\%$ , Aldrich code 24233-2.5L-R). Thermogravimetric analysis (TGA) was carried out in N<sub>2</sub> flow (100 cm<sup>3</sup>/min STP) with a TGA Q500, TA Instruments, in the range 20-1000 °C at 10 °C min<sup>-1</sup> heating rate.

## Synthesis of Ligands

### *Synthesis of Lig<sup>1</sup>H*

This compound was synthesized by modification of a literature procedure.<sup>S2</sup> To a solution of bis(2-pyridylmethyl)amine (720 mg, 3.61 mmol) in dichloromethane (40 mL), sodium triacetoxyborohydride (990 mg, 4.67 mmol) was added at 0 °C. The mixture was stirred at 0 °C for 1 h, after which salicylaldehyde (440 mg, 3.61 mmol) was added. After additional 4 h stirring at room temperature, the reaction was quenched by adding NaHCO<sub>3</sub> 10% solution (20 mL). The organic phase was separated and dried over Na<sub>2</sub>SO<sub>4</sub>. The solvent was removed under vacuum and the crude product was purified by passing through a plug of silica with ethyl acetate as eluent. A yellow oil was obtained. The overall yield was 82%.

<sup>1</sup>H NMR (CDCl<sub>3</sub>, 500 MHz): δ 11.09 (brs, 1H, OH), 8.57 (d, 2H, *J*=4.6 Hz, ArH), 7.62 (td, 2H, *J*=1.7Hz, *J*=7.7Hz, ArH), 7.34 (d, 2H, *J*=7.8Hz, ArH), 7.19-7.14 (m, 3H, ArH), 7.06 (dd, 1H, *J*=1.3Hz, *J*=7.6Hz, ArH), 6.91 (dd, 1H, *J*=0.7Hz, *J*=8.0Hz, ArH), 6.77 (td, 1H, *J*=1.0Hz, *J*=7.4Hz, ArH), 3.88 (s, 4H, CH<sub>2</sub>), 3.80 (s, 2H, CH<sub>2</sub>). <sup>13</sup>C NMR (CDCl<sub>3</sub>, 125 MHz): δ 158.43 (C), 157.73 (C), 149.07 (CH), 136.91 (CH), 130.30 (CH), 129.20 (CH), 123.37 (CH), 122.95 (C), 122.36 (CH), 119.00 (CH), 116.68 (CH), 59.25 (CH<sub>2</sub>), 57.10 (CH<sub>2</sub>). HRMS (ESI): Calc for C<sub>19</sub>H<sub>19</sub>N<sub>3</sub>O: 305.1528, found: 328.1428 (M-Na<sup>+</sup>).

### *Synthesis of Lig<sup>4</sup>H*

This compound was synthesized according to the procedure described above employing 3-adamantyl-5-methylsalicylaldehyde. A yellow solid was obtained in an overall yield of 90%.

<sup>1</sup>H NMR (CDCl<sub>3</sub>, 500 MHz): δ 10.45 (brs, 1H, OH), 8.56 (d, 2H, *J*=4.6Hz), 7.63 (td, 2H, *J*=1.7Hz, *J*=7.7Hz, ArH), 7.33 (d, 2H, *J*=7.8Hz, ArH), 7.15 (dd, 2H, *J*=4.8Hz, *J*=7.6Hz, ArH), 6.94 (d, 1H, *J*=1.6Hz, ArH), 6.71 (d, 1H, *J*=1.4Hz, ArH), 3.85 (s, 4H, CH<sub>2</sub>), 3.76 (s, 2H, CH<sub>2</sub>), 2.23 (s, 3H, CH<sub>3</sub>), 2.20 (brs, 6H, Ad), 2.08 (brs, 6H, Ad), 1.83 (d, 3H, *J*=12.0Hz, Ad), 1.78 (d, 3H, *J*=12.0Hz, Ad). <sup>13</sup>C NMR (CDCl<sub>3</sub>, 125 MHz): δ 158.23 (C), 154.40 (C), 149.14 (CH), 136.84 (C), 136.76 (CH), 128.45 (CH), 127.21 (C), 126.93 (CH), 123.76 (CH), 122.83 (C), 122.33 (CH), 59.45 (CH<sub>2</sub>),

58.03 (CH<sub>2</sub>), 40.68 (C), 40.54 (CH<sub>2</sub>), 37.41 (CH<sub>2</sub>), 36.98 (CH), 29.40 (CH<sub>2</sub>), 20.92 (CH<sub>3</sub>). HRMS (ESI): Calc for C<sub>30</sub>H<sub>35</sub>N<sub>3</sub>O: 453.2780, found: 454.2854 (MH<sup>+</sup>).

### *Synthesis of Lig<sup>5</sup>H*

This compound was synthesized according to the procedure described above employing 3,5-bis(dimethylbenzyl)salicylaldehyde. A yellow solid was obtained in an overall yield of 94%.

<sup>1</sup>H NMR (CDCl<sub>3</sub>, 500 MHz): δ 10.34 (brs, 1H, OH), 8.45 (d, 2H, *J*=4.5Hz, ArH), 7.47 (td, 2H, *J*=1.8Hz, *J*=7.7Hz, ArH), 7.26-7.21 (m, 6H, ArH), 7.18-7.14 (m, 3H, ArH), 7.14-7.08 (m, 3H, ArH), 6.92 (d, 2H, *J*=7.8Hz, ArH), 6.76 (d, 1H, *J*=2.3Hz, ArH), 3.68 (s, 2H, CH<sub>2</sub>), 3.67 (s, 2H, CH<sub>2</sub>), 1.68 (s, 6H, CH<sub>3</sub>), 1.67 (s, 6H, CH<sub>3</sub>). <sup>13</sup>C NMR (CDCl<sub>3</sub>, 125 MHz): δ 157.88 (C), 153.54 (C), 151.94 (C), 151.54 (C), 148.95 (CH), 140.02 (C), 136.81 (CH), 135.39 (C), 128.01 (CH), 127.74 (CH), 126.90 (CH), 126.67 (CH), 125.93 (CH), 125.53 (CH), 125.17 (CH), 124.71 (CH), 124.02 (CH), 122.25 (CH), 121.83 (C), 59.15 (CH<sub>2</sub>), 58.24 (CH<sub>2</sub>), 42.60 (C), 42.25 (C), 31.25 (CH<sub>3</sub>), 29.63 (CH<sub>3</sub>). HRMS (ESI): Calc for C<sub>37</sub>H<sub>39</sub>N<sub>3</sub>O: 541.3093, found: 542.3177 (MH<sup>+</sup>).

## Synthesis of Chloro-Magnesium Complexes

### *Synthesis of $[(\mu\text{-Lig}^1)\text{Mg-Cl}]_2$*

To a stirred solution of Lig<sup>1</sup>H (80 mg, 0.26 mmol) in toluene (2 mL), was added a solution of BnMgCl (0.26 mL, 1M diethyl ether solution) drop-wise. The resulting mixture was stirred at room temperature for 30 min until a precipitate appeared. The solvent was removed under vacuum and the residue was washed with pentane to give a yellow solid in 61% yield. Crystals suitable for X-ray diffraction were grown from dichloromethane solution at -30 °C.

<sup>1</sup>H NMR (CDCl<sub>3</sub>, 500 MHz):  $\delta$  8.95 (d, 2H,  $J=14.3\text{Hz}$ , ArH), 7.73 (t, 1H,  $J=7.2\text{Hz}$ , ArH), 7.35 (d, 1H,  $J=7.3\text{Hz}$ , ArH), 7.23 (t, 1H,  $J=7.0\text{Hz}$ , ArH), 7.04 (t, 1H,  $J=5.8\text{Hz}$ , ArH), 6.77 (t, 1H,  $J=5.8\text{Hz}$ , ArH), 6.62 (t, 2H,  $J=8.3\text{Hz}$ , ArH), 6.42 (d, 1H,  $J=12.3\text{Hz}$ , CH<sub>2</sub>), 6.19 (t, 1H,  $J=7.0\text{Hz}$ , ArH), 6.05 (t, 1H,  $J=7.0\text{Hz}$ , ArH), 5.23 (d, 1H,  $J=15.0\text{Hz}$ , CH<sub>2</sub>), 4.85 (d, 1H,  $J=7.6\text{Hz}$ , ArH), 4.10 (d, 1H,  $J=15.1\text{Hz}$ , CH<sub>2</sub>), 3.82 (d, 1H,  $J=15.0\text{Hz}$ , CH<sub>2</sub>), 3.49 (d, 1H,  $J=15.1\text{Hz}$ , CH<sub>2</sub>), 3.38 (d, 1H,  $J=12.2\text{Hz}$ , CH<sub>2</sub>). <sup>13</sup>C NMR (CDCl<sub>3</sub>, 125 MHz):  $\delta$  163.61 (C), 156.45 (C), 156.33 (C), 151.69 (CH), 150.92 (CH), 138.40(CH), 137.14 (CH), 129.97 (CH), 128.25 (CH), 127.65 (C), 122.99 (CH), 122.72 (CH), 122.17 (CH), 120.68 (CH), 119.08 (CH), 115.40 (CH), 64.50 (CH<sub>2</sub>), 61.57 (CH<sub>2</sub>), 61.49 (CH<sub>2</sub>). HRMS (APPI): Calc for C<sub>38</sub>H<sub>36</sub>Cl<sub>2</sub>Mg<sub>2</sub>N<sub>6</sub>O<sub>2</sub>: 726.1978, found: 691.2275 ([M-Cl]<sup>+</sup>).

*Crystal Data for Complex  $[(\mu\text{-Lig}^1)\text{Mg-Cl}]_2 \cdot 2\text{CH}_2\text{Cl}_2$ .* C<sub>19</sub>H<sub>18</sub>ClN<sub>3</sub>OMg, 2CH<sub>2</sub>Cl<sub>2</sub>; M = 533.97; monoclinic; space group C2/c; a = 24.0022(18) Å, b = 8.6136(6) Å, c = 25.556(3) Å,  $\beta=116.047(3)^\circ$ , V = 4746.9(7) Å<sup>3</sup>; T = 110(2) K; Z = 8; Dc = 1.494 g cm<sup>-3</sup>;  $\mu$  (MoK $\alpha$ ) = 0.658 mm<sup>-1</sup>; R1 = 0.0516 and wR2 = 0.0972 for 4733 reflections with I > 2 $\sigma$ (I); R1 = 0.0391 and wR2 = 0.0912 for all 3904 unique reflections. CCDC No. 1537631.

### Synthesis of $[(\mu\text{-Lig}^2)\text{Mg-Cl}]_2$

To a stirred solution of Lig<sup>2</sup>H (76 mg, 0.23 mmol) in toluene (2 mL), was added a solution of BnMgCl (0.23 mL, 1M diethyl ether solution) drop-wise. The resulting mixture was stirred at room temperature for 1 h until a precipitate appeared. The solvent was removed under vacuum and the residue was washed with pentane to give a yellow solid in 74% yield.

<sup>1</sup>H NMR (CDCl<sub>3</sub>, 500 MHz):  $\delta$  9.25 (d, 1H,  $J=5.7$ Hz, ArH), 9.12 (d, 1H,  $J=5.7$ Hz, ArH), 7.69 (td, 1H,  $J=1.7$ Hz,  $J=7.6$ Hz, ArH), 7.28 (d, 1H,  $J=7.7$ Hz, ArH), 7.16 (td, 1H,  $J=1.7$ Hz,  $J=7.6$ Hz, ArH), 7.07 (t, 1H,  $J=6.4$ Hz, ArH), 6.76 (t, 1H,  $J=6.4$ Hz, ArH), 6.56 (d, 1H,  $J=11.9$ Hz, CH<sub>2</sub>), 6.54 (d, 1H,  $J=2.0$ Hz, ArH), 6.37 (d, 1H,  $J=7.7$ Hz, ArH), 5.96 (d, 1H,  $J=1.6$ Hz, ArH), 4.92 (d, 1H,  $J=14.9$ Hz, CH<sub>2</sub>), 3.95 (d, 1H,  $J=14.9$ Hz, CH<sub>2</sub>), 3.61 (d, 1H,  $J=14.9$ Hz, CH<sub>2</sub>), 3.40 (d, 1H,  $J=15.1$ Hz, CH<sub>2</sub>), 3.37 (d, 1H,  $J=13.9$ Hz, CH<sub>2</sub>), 1.94 (s, 3H, CH<sub>3</sub>), 0.95 (s, 3H, CH<sub>3</sub>). <sup>13</sup>C NMR (CDCl<sub>3</sub>, 125 MHz):  $\delta$  158.63 (C), 156.75 (C), 155.91 (C), 152.25 (CH), 149.70 (CH), 138.49 (CH), 136.62 (CH), 130.97 (CH), 129.13 (CH), 126.85 (C), 126.79 (C), 124.08 (C), 123.41 (CH), 122.75 (CH), 121.65 (CH), 120.06 (CH), 65.24 (CH<sub>2</sub>), 62.29 (CH<sub>2</sub>), 61.47 (CH<sub>2</sub>), 20.33 (CH<sub>3</sub>), 14.21 (CH<sub>3</sub>). HRMS (APPI): Calc for C<sub>42</sub>H<sub>44</sub>Cl<sub>2</sub>Mg<sub>2</sub>N<sub>6</sub>O<sub>2</sub>: 782.2604, found: 747.2916 ([M-Cl]<sup>+</sup>).

*Crystal Data for Complex  $[(\mu\text{-Lig}^2)\text{MgCl}]_2 \cdot 5\text{CH}_2\text{Cl}_2$ .* C<sub>42</sub>H<sub>44</sub>Cl<sub>2</sub>N<sub>6</sub>O<sub>2</sub>Mg<sub>2</sub>, 5CH<sub>2</sub>Cl<sub>2</sub>; M = 1208.98; monoclinic; space group C2/c; a = 27.2980(18) Å, b = 14.9001(12) Å, c = 16.8775(10) Å,  $\beta=124.630(2)^\circ$ , V = 5648.6(7) Å<sup>3</sup>; T = 110(2) K; Z = 4; Dc = 1.422 g cm<sup>-3</sup>;  $\mu$  (Mo K $\alpha$ ) = 0.653 mm<sup>-1</sup>; R1 = 0.0702 and wR2 = 0.0567 for 5026 reflections with I > 2 $\sigma$ (I); R1 = 0.1604 and wR2 = 0.1488 for all 4116 unique reflections. CCDC No. 1537632.

### *Synthesis of Lig<sup>3</sup>Mg-Cl*

To a stirred solution of Lig<sup>3</sup>H (92 mg, 0.22 mmol) in toluene (2 mL), was added a solution of BnMgCl (0.22 mL, 1M diethyl ether solution) drop-wise. The resulting mixture was stirred at room temperature for 1 h until a precipitate appeared. The solvent was removed under vacuum and the residue was washed with pentane to give a yellow solid in 90% yield.

<sup>1</sup>H NMR (CDCl<sub>3</sub>, 500 MHz): δ 9.35 (d, 2H, *J*=5.1Hz, ArH), 7.84 (td, 2H, *J*=1.4Hz, *J*=7.5Hz, ArH), 7.41 (t, 2H, *J*=6.5Hz, ArH), 7.29 (d, 2H, *J*=7.7Hz, ArH), 7.17 (d, 1H, *J*=2.5Hz, ArH), 6.80 (d, 1H, *J*=2.5Hz, ArH), 4.09 (d, 2H, *J*=15.7Hz, CH<sub>2</sub>), 3.82 (d, 2H, *J*=15.7Hz, CH<sub>2</sub>), 3.75 (brs, 2H, CH<sub>2</sub>), 1.43 (s, 9H, C(CH<sub>3</sub>)<sub>3</sub>), 1.24 (s, 9H, C(CH<sub>3</sub>)<sub>3</sub>). <sup>13</sup>C NMR (CDCl<sub>3</sub>, 125 MHz): δ 163.35 (C), 157.00 (C), 151.75 (CH), 139.99 (CH), 138.58 (C), 134.07 (C), 129.19 (CH), 128.38 (CH), 125.45 (CH), 125.33 (CH), 124.30 (CH), 124.16 (CH), 123.18 (CH), 120.99 (C), 60.92 (CH<sub>2</sub>), 58.45 (CH<sub>2</sub>), 35.36 (C), 33.95 (C), 32.06 (CH<sub>3</sub>), 29.78 (CH<sub>3</sub>). HRMS (APPI): Calc for C<sub>27</sub>H<sub>34</sub>N<sub>3</sub>OCIMg: 475.2241, found: 476.2302 (MH<sup>+</sup>).

### *Synthesis of Lig<sup>4</sup>Mg-Cl*

To a stirred solution of Lig<sup>3</sup>H (104 mg, 0.23 mmol) in toluene (2 mL), was added a solution of BnMgCl (0.23 mL, 1M diethyl ether solution) drop-wise. The resulting mixture was stirred at room temperature for 1 h until a precipitate appeared. The solvent was removed under vacuum and the residue was washed with pentane to give a yellow solid in 91% yield.

<sup>1</sup>H NMR (CDCl<sub>3</sub>, 500 MHz): δ 9.38 (d, 2H, *J*=4.9Hz, ArH), 7.84 (td, 2H, *J*=1.7Hz, *J*=7.7Hz, ArH), 7.42 (t, 2H, *J*=6.5Hz, ArH), 7.28 (d, 2H, *J*=7.8Hz, ArH), 6.88 (d, 1H, *J*=2.1Hz, ArH), 6.64 (d, 1H, *J*=2.0Hz, ArH), 4.07 (d, 2H, *J*=15.8Hz, CH<sub>2</sub>), 3.79 (d, 2H, *J*=15.7Hz, CH<sub>2</sub>), 3.73 (brs, 1H, CH<sub>2</sub>), 2.21 (d, 6H, *J*=2.0Hz, Ad), 2.18 (s, 3H, CH<sub>3</sub>), 2.04 (brs, 3H, Ad), 1.87 (d, 3H, *J*=11.3Hz, Ad), 1.72 (d, 3H, *J*=11.7Hz, Ad). <sup>13</sup>C NMR (CDCl<sub>3</sub>, 125 MHz): δ 163.43 (C), 156.99 (C), 151.85 (CH), 140.03 (CH), 139.74 (C), 129.19 (CH), 129.11 (CH), 128.38 (CH), 127.80 (CH), 125.45 (CH), 124.20 (CH), 123.16 (CH), 122.13 (C), 120.63 (C), 60.35 (CH<sub>2</sub>), 58.29 (CH<sub>2</sub>), 40.21 (CH<sub>2</sub>), 37.61



(CH<sub>2</sub>), 37.21 (C), 29.59 (CH<sub>3</sub>), 20.89 (CH). HRMS (APPI): Calc for C<sub>30</sub>H<sub>34</sub>N<sub>3</sub>OCIMg: 511.2241, found: 512.2300 (MH<sup>+</sup>).

### *Synthesis of Lig<sup>5</sup>Mg-Cl*

To a stirred solution of Lig<sup>5</sup>H (110 mg, 0.20 mmol) in toluene (2 mL), was added a solution of BnMgCl (0.20 mL, 1M diethyl ether solution) drop-wise. The resulting mixture was stirred at room temperature for 1 h until a precipitate appeared. The solvent was removed under vacuum and the residue was washed with pentane to give a yellow solid in 88% yield.

<sup>1</sup>H NMR (CDCl<sub>3</sub>, 500 MHz): δ 9.11 (d, 2H, *J*=4.5Hz, ArH), 7.79 (td, 2H, *J*=1.7Hz, *J*=7.7Hz, ArH), 7.36 (t, 2H, *J*=6.2Hz, ArH), 7.25-7.18 (m, 7H, ArH), 7.13-7.11 (m, 3H, ArH), 6.77 (t, 2H, *J*=7.3Hz, ArH), 6.63 (d, 1H, *J*=2.5Hz, ArH), 6.58 (t, 1H, *J*=7.2Hz, ArH), 3.75 (d, 2H, *J*=15.5Hz, CH<sub>2</sub>), 3.58 (d, 4H, *J*=15.5Hz, CH<sub>2</sub>), 1.69 (brs, 6H, CH<sub>3</sub>), 1.65 (s, 6H, CH<sub>3</sub>). <sup>13</sup>C NMR (CDCl<sub>3</sub>, 125 MHz): δ 162.23 (C), 156.68 (C), 152.91 (C), 152.76 (C), 151.96 (CH), 139.73 (CH), 138.77 (C), 133.24 (C), 127.74 (CH), 127.22 (CH), 126.99 (CH), 126.74 (CH), 126.08 (CH), 126.04 (CH), 125.13 (CH), 123.87 (CH), 123.83 (CH), 122.88 (CH), 121.07 (C), 60.00 (CH<sub>2</sub>), 42.37 (C), 42.30 (C), 31.38 (CH<sub>3</sub>). HRMS (APPI): Calc for C<sub>37</sub>H<sub>38</sub>N<sub>3</sub>OCIMg: 599.2554, found: 600.2634 (MH<sup>+</sup>).

### **General Homo-Polymerization Procedure**

To a solution of the catalyst (0.01 mmol) in dichloromethane (5 mL), benzyl alcohol (either none or 0.01-0.04 mmol) was added, and the reaction mixture was stirred at room temperature for 2 min. Then, L-lactide (432 mg, 3 mmol) was added, and the reaction was stirred at room temperature. After the desired time, the reaction was terminated by exposing to air and the volatiles were removed under vacuum.

### **General Block-Copolymerization Procedure**

To a solution of the catalyst (0.01 mmol) in dichloromethane (5 mL), benzyl alcohol was added and the reaction mixture was stirred at room temperature for 2 min. Then, either D- or L-Lactide were sequentially added, maintaining the necessary delay (5-10 min) between each addition. The reaction was terminated by exposing to air and the volatiles were removed under vacuum. The tacticity of the PLA samples was determined by the homonuclear-decoupled  $^1\text{H}$  NMR spectrometry ( $\text{CDCl}_3$ , 500 MHz) and by  $^{13}\text{C}$  NMR ( $\text{CDCl}_3$ , 125 MHz) as previously described.<sup>S3</sup>

## NMR Spectra of the Ligands Precursors

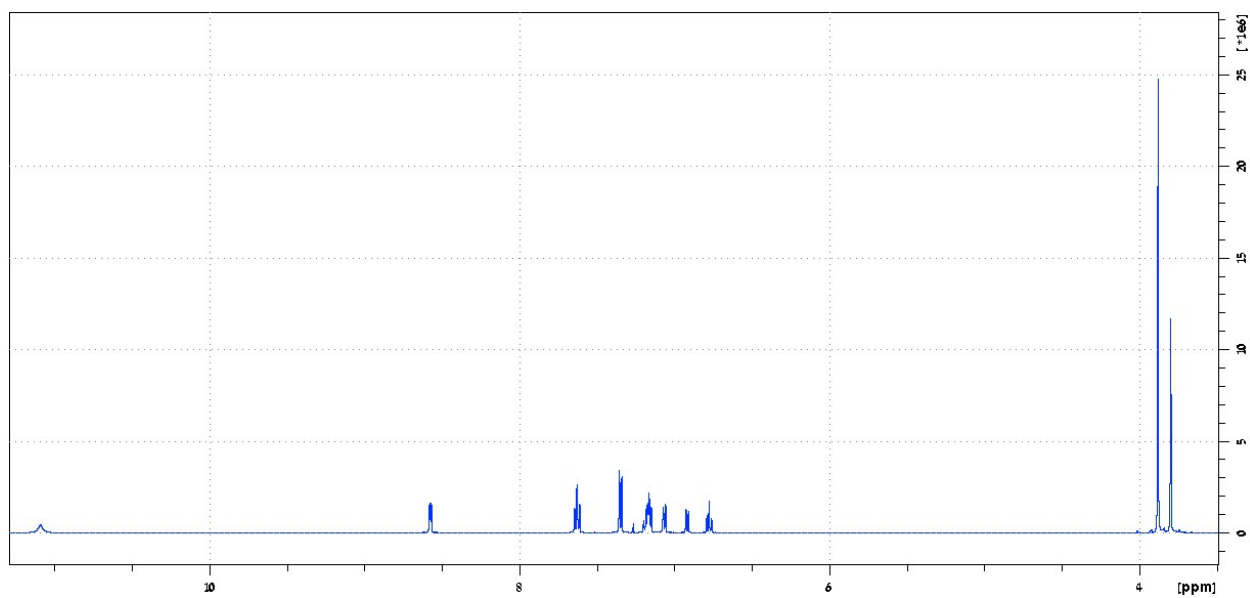

**Figure S1.** <sup>1</sup>H-NMR of Lig<sup>1</sup>H (CDCl<sub>3</sub>, 500MHz).

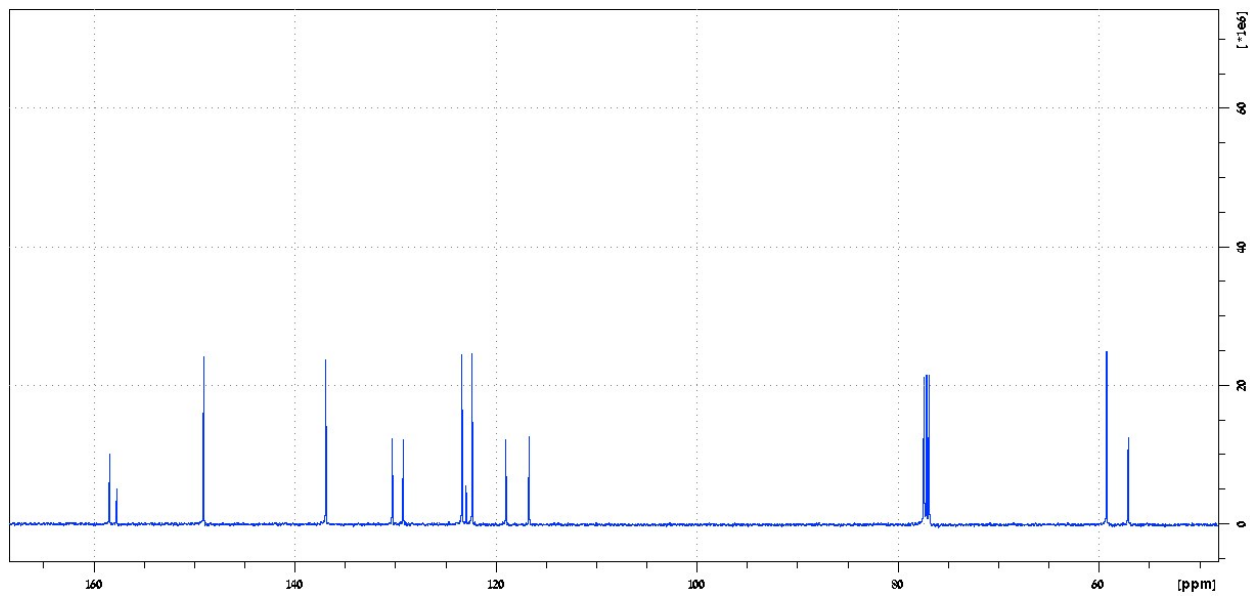

**Figure S2.** <sup>13</sup>C-NMR of Lig<sup>1</sup>H (CDCl<sub>3</sub>, 125MHz).

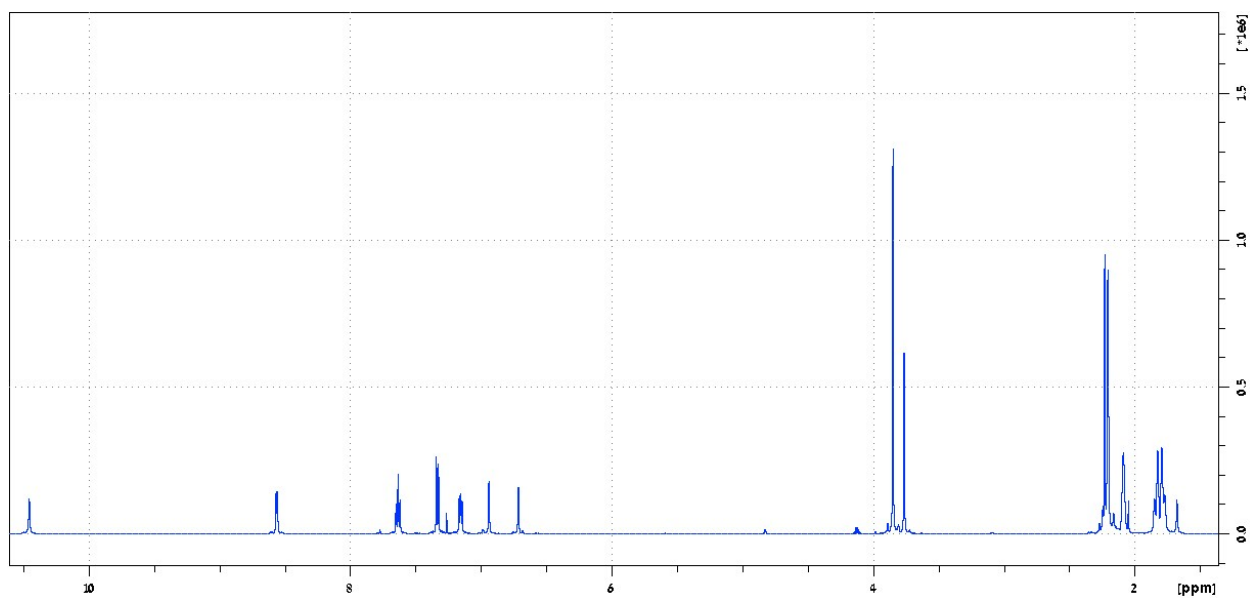

**Figure S3.**  $^1\text{H}$ -NMR of  $\text{Lig}^4\text{H}$  ( $\text{CDCl}_3$ , 500MHz).

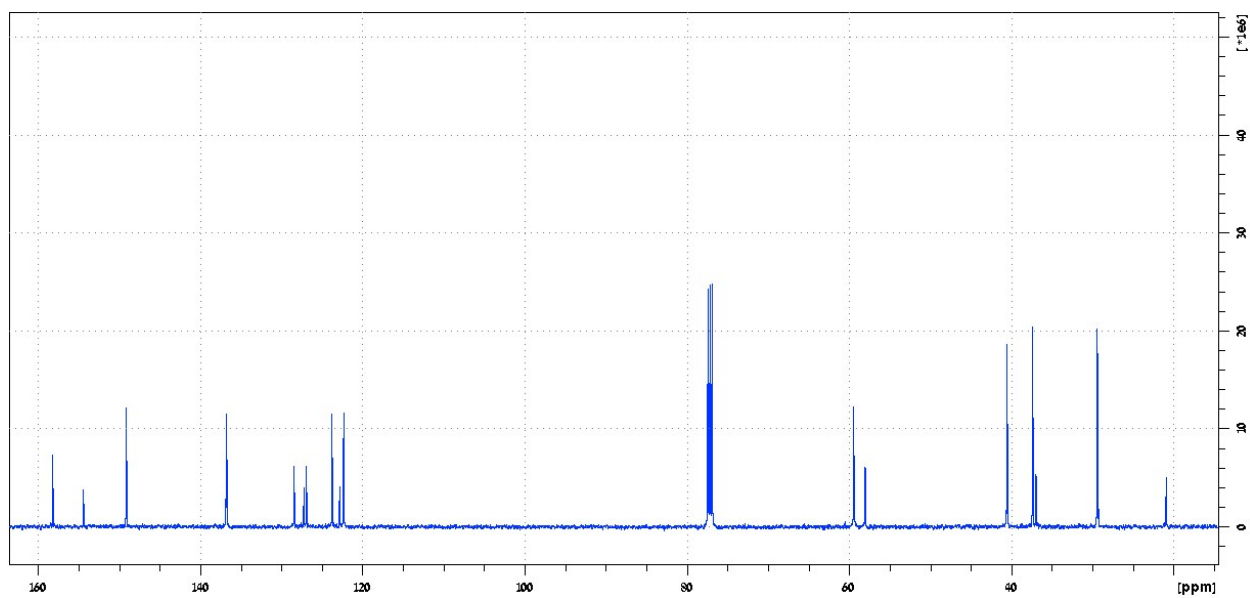

**Figure S4.**  $^{13}\text{C}$ -NMR of  $\text{Lig}^4\text{H}$  ( $\text{CDCl}_3$ , 500MHz).

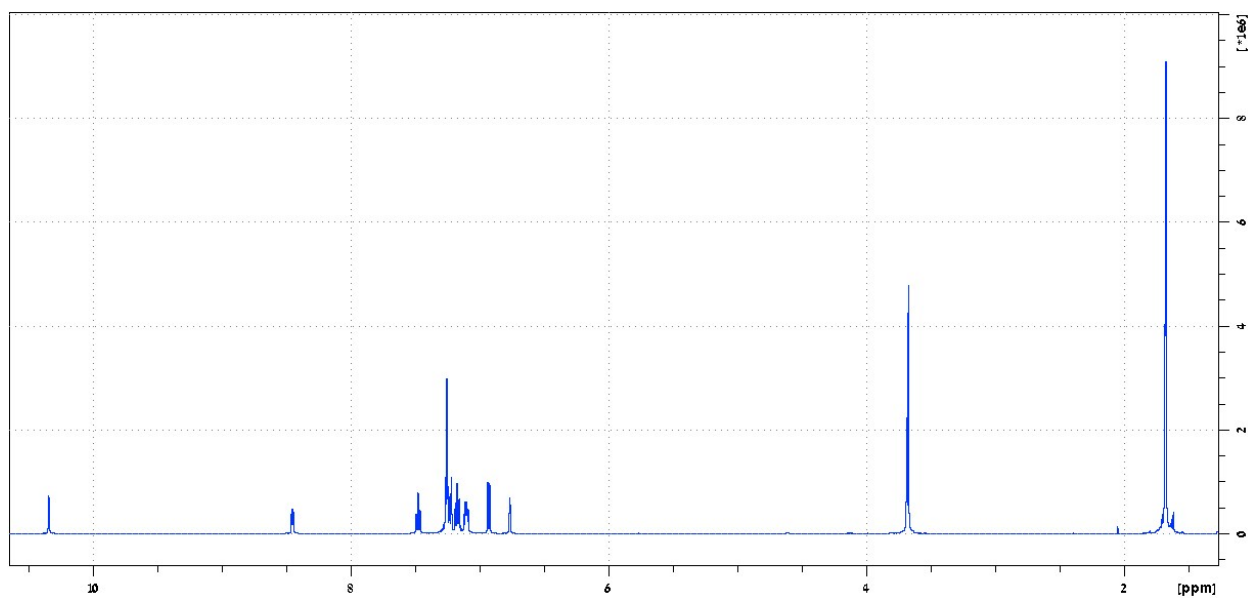

**Figure S5.**  $^1\text{H}$ -NMR of Lig $^5\text{H}$  ( $\text{CDCl}_3$ , 500MHz).

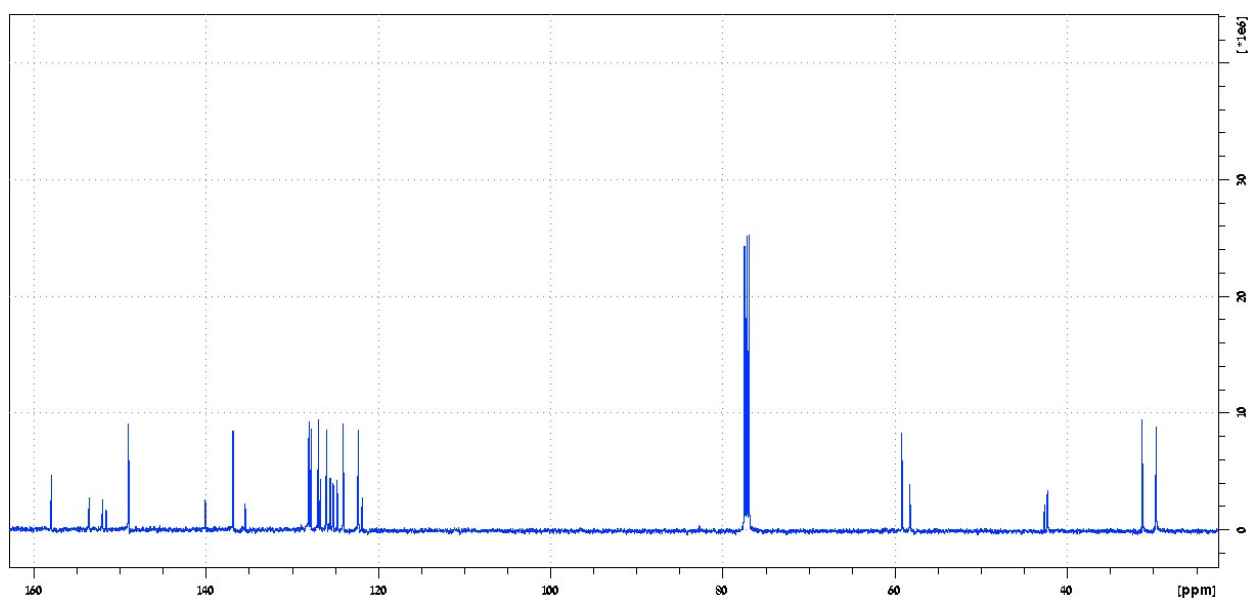

**Figure S6.**  $^{13}\text{C}$ -NMR of Lig $^5\text{H}$  ( $\text{CDCl}_3$ , 500MHz).

## NMR Spectra of the Magnesium Complexes

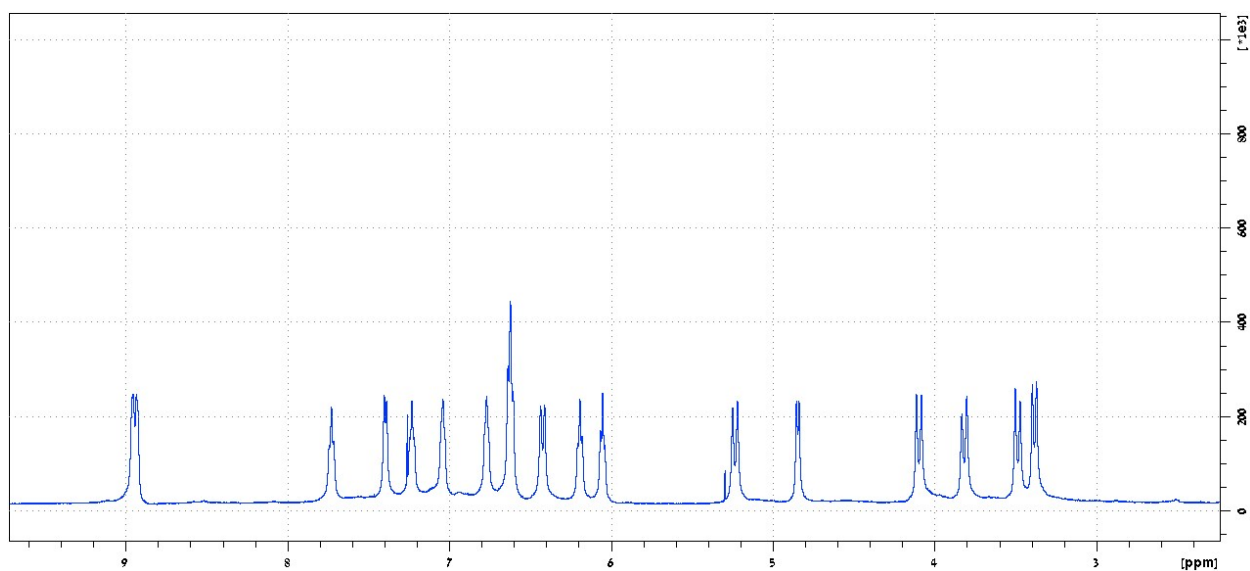

**Figure S7.**  $^1\text{H-NMR}$  of  $[(\mu\text{-Lig}^1)\text{Mg-Cl}]_2$  ( $\text{CDCl}_3$ , 500MHz).

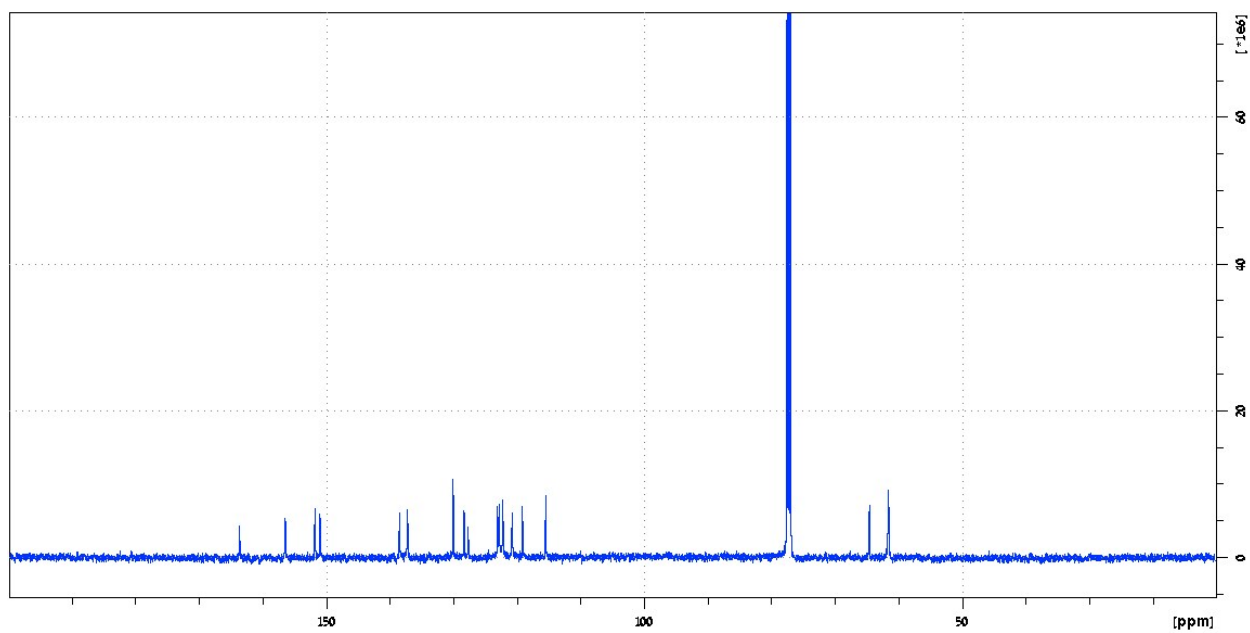

**Figure S8.**  $^{13}\text{C-NMR}$  of  $[(\mu\text{-Lig}^1)\text{Mg-Cl}]_2$  ( $\text{CDCl}_3$ , 500MHz).

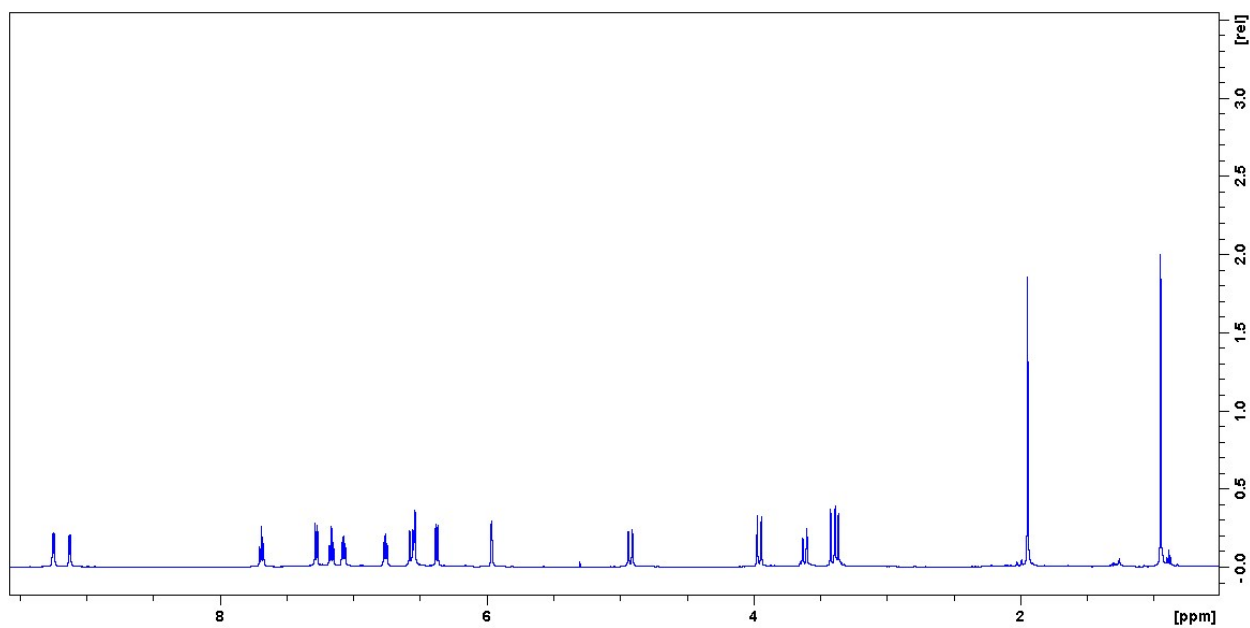

**Figure S9.**  $^1\text{H}$ -NMR of  $[(\mu\text{-Lig}^2)\text{Mg-Cl}]_2$  ( $\text{CDCl}_3$ , 500MHz).

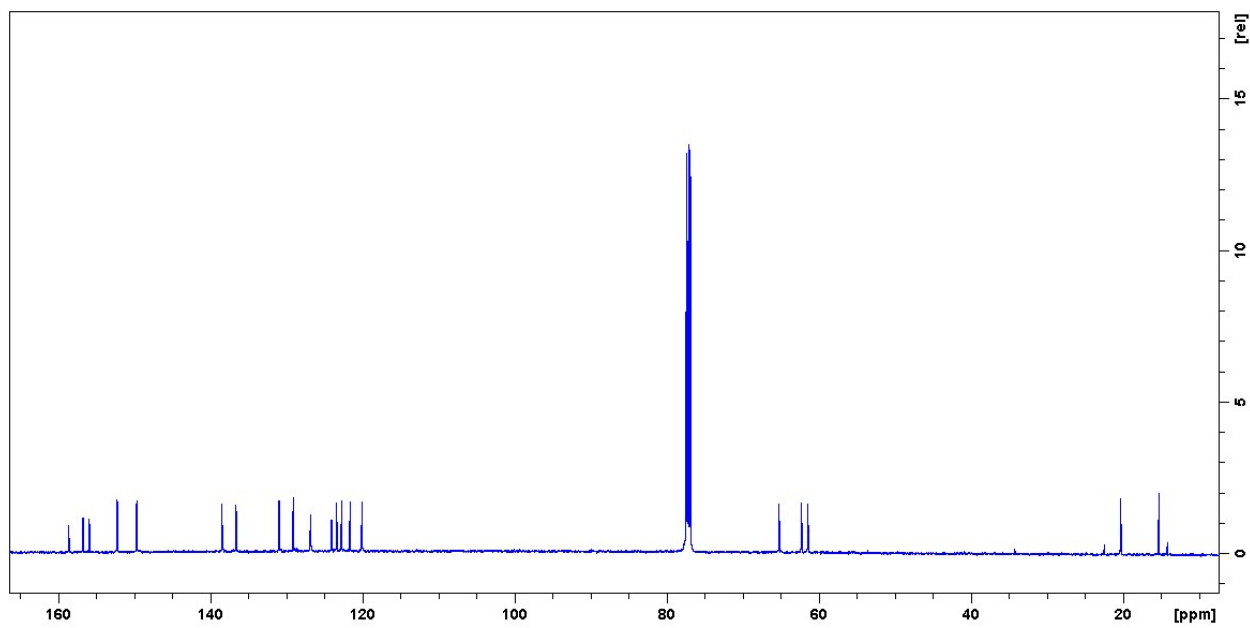

**Figure S10.**  $^{13}\text{C}$ -NMR of  $[(\mu\text{-Lig}^2)\text{Mg-Cl}]_2$  ( $\text{CDCl}_3$ , 500MHz).

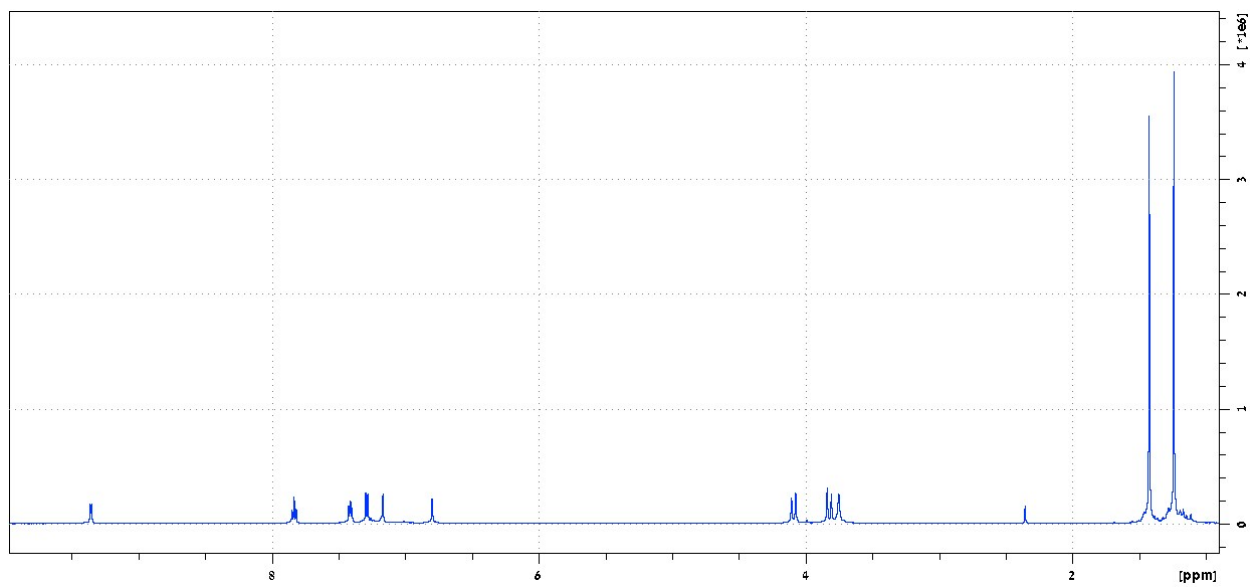

**Figure S11.**  $^1\text{H-NMR}$  of  $\text{Lig}^3\text{Mg-Cl}$  ( $\text{CDCl}_3$ , 500MHz).

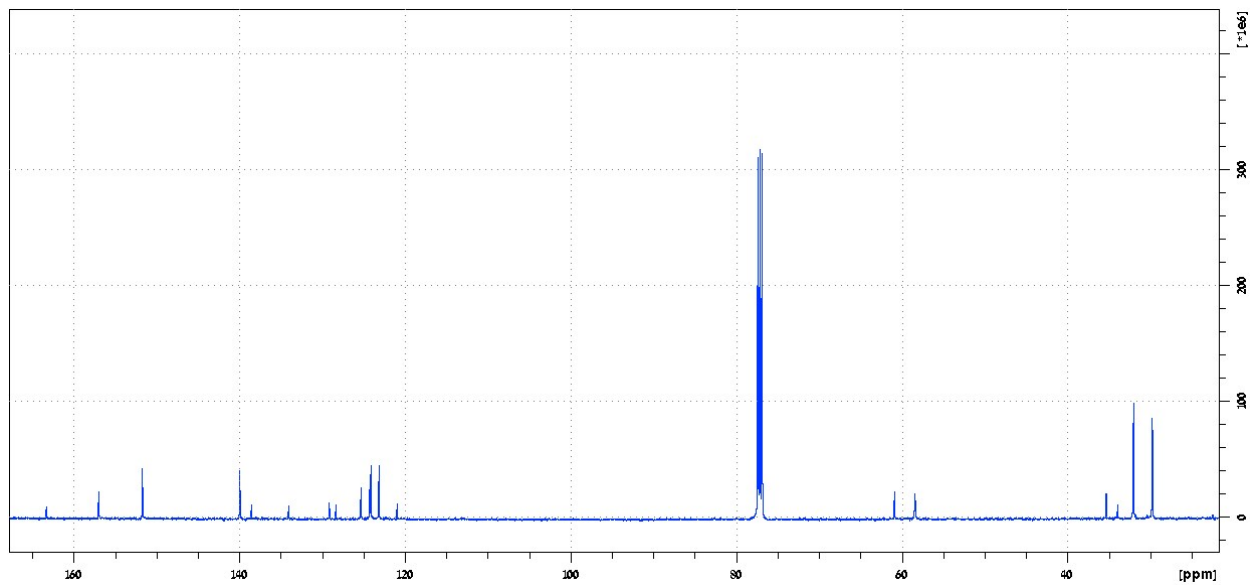

**Figure S12.**  $^{13}\text{C-NMR}$  of  $\text{Lig}^3\text{Mg-Cl}$  ( $\text{CDCl}_3$ , 500MHz).



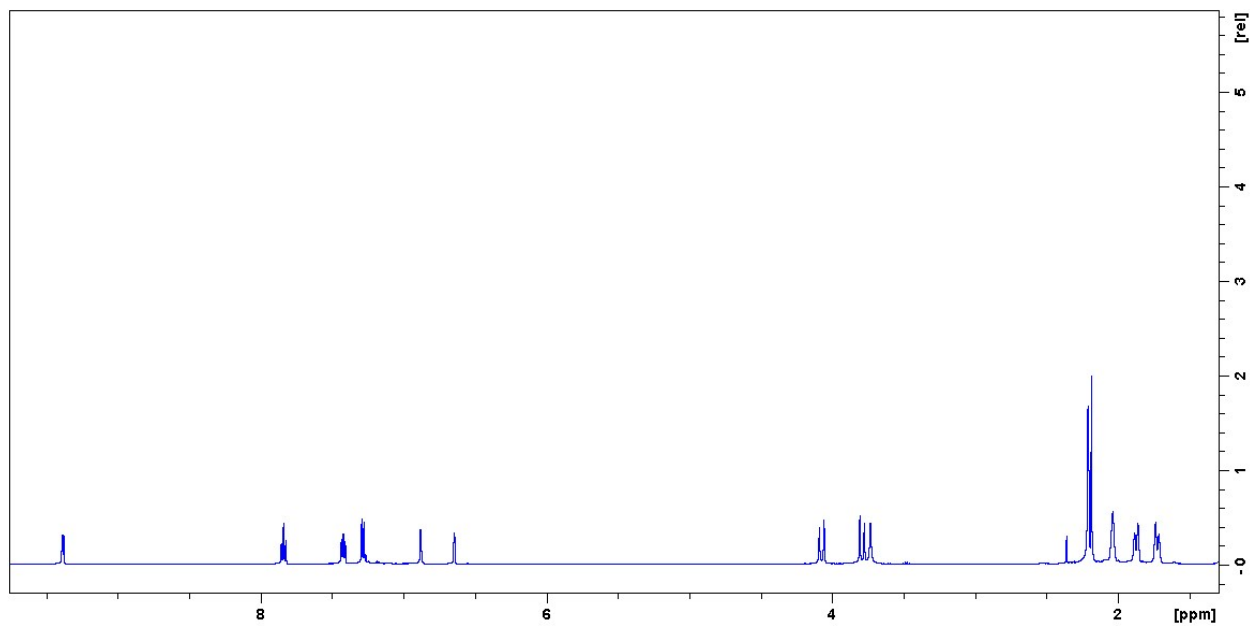

**Figure S13.**  $^1\text{H}$ -NMR of  $\text{Lig}^4\text{Mg-Cl}$  ( $\text{CDCl}_3$ , 500MHz).

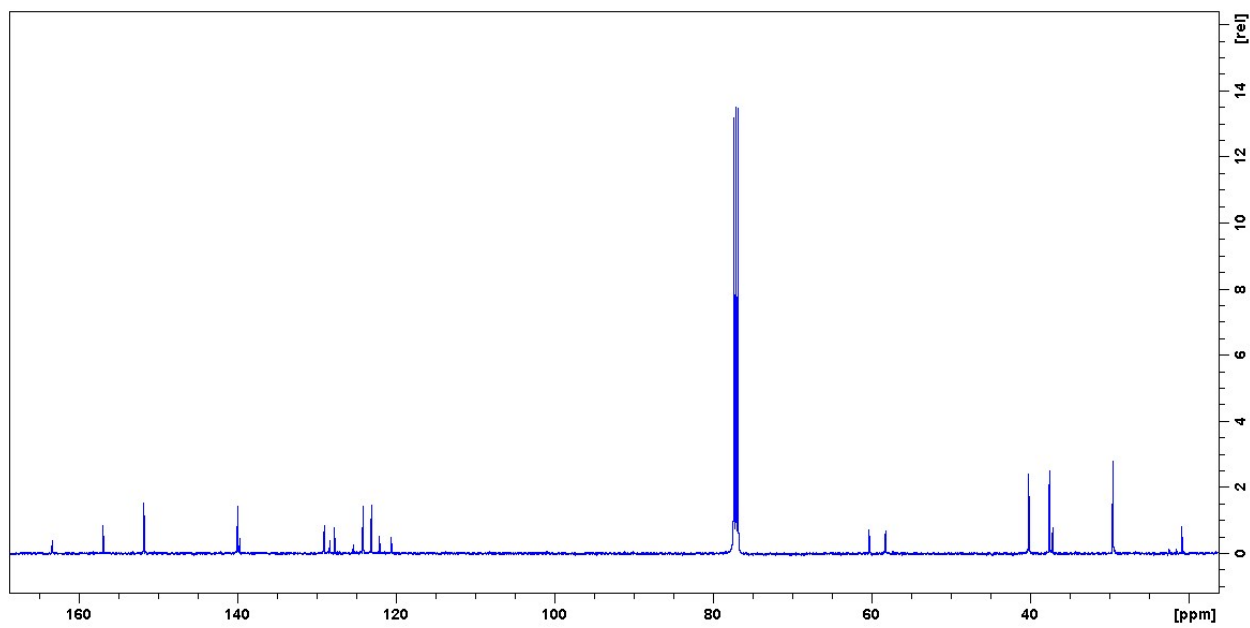

**Figure S14.**  $^{13}\text{C}$ -NMR of  $\text{Lig}^4\text{Mg-Cl}$  ( $\text{CDCl}_3$ , 500MHz).

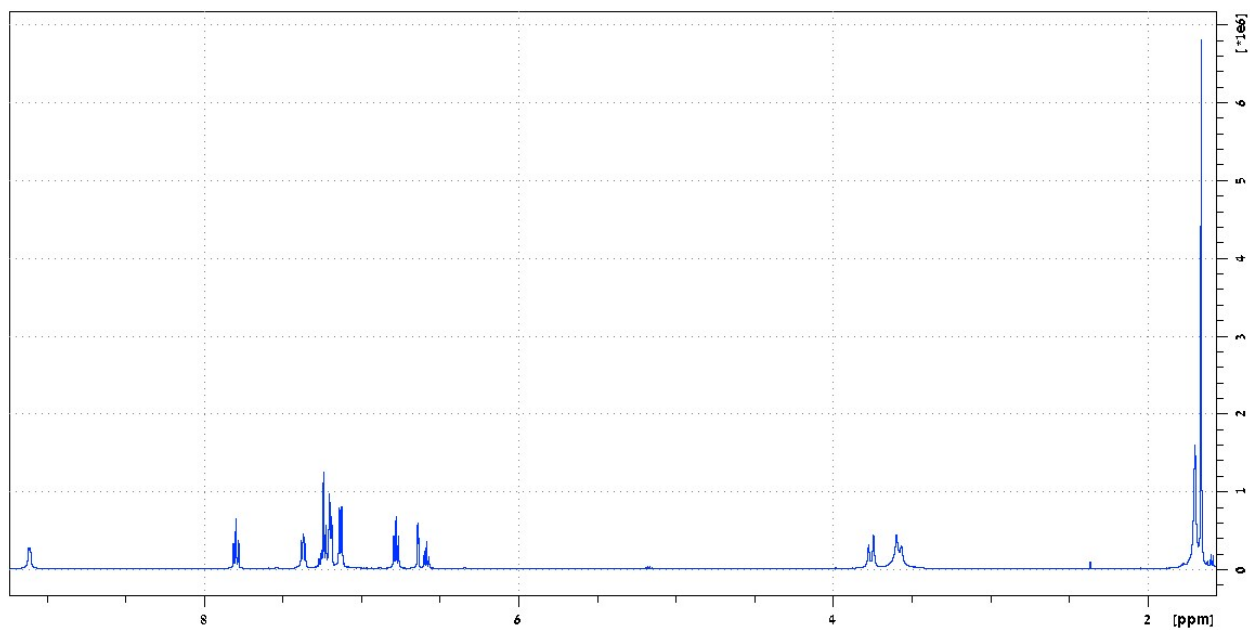

**Figure S15.**  $^1\text{H-NMR}$  of  $\text{Lig}^5\text{Mg-Cl}$  ( $\text{CDCl}_3$ , 500MHz).

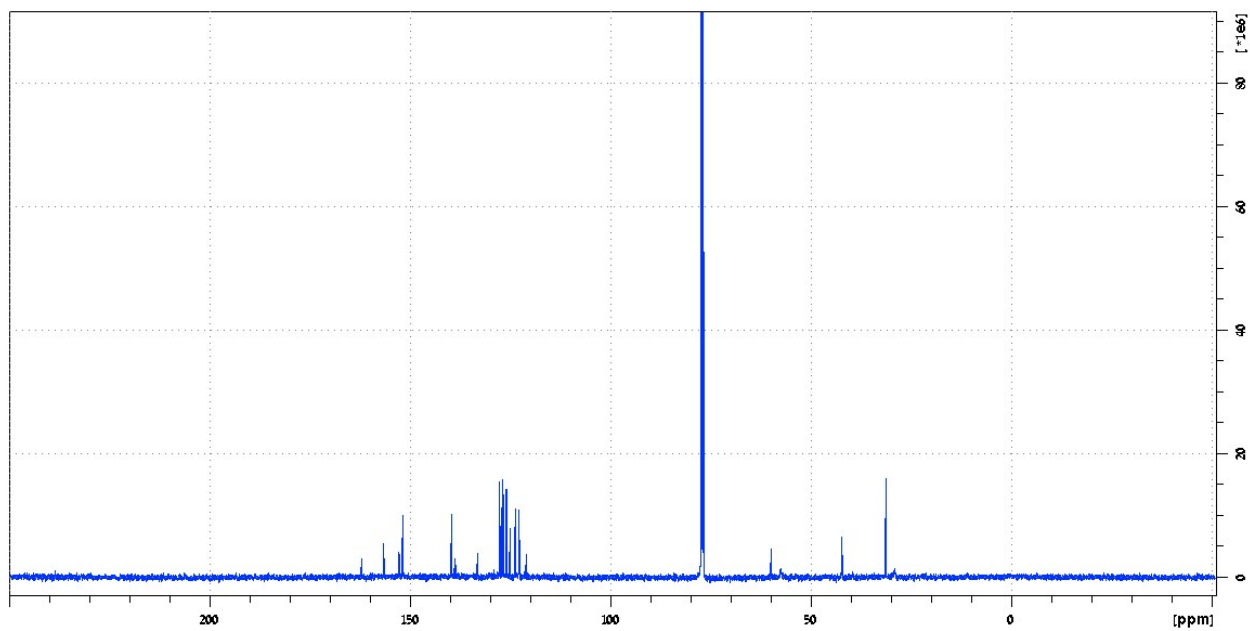

**Figure S16.**  $^{13}\text{C-NMR}$  of  $\text{Lig}^5\text{Mg-Cl}$  ( $\text{CDCl}_3$ , 500MHz).

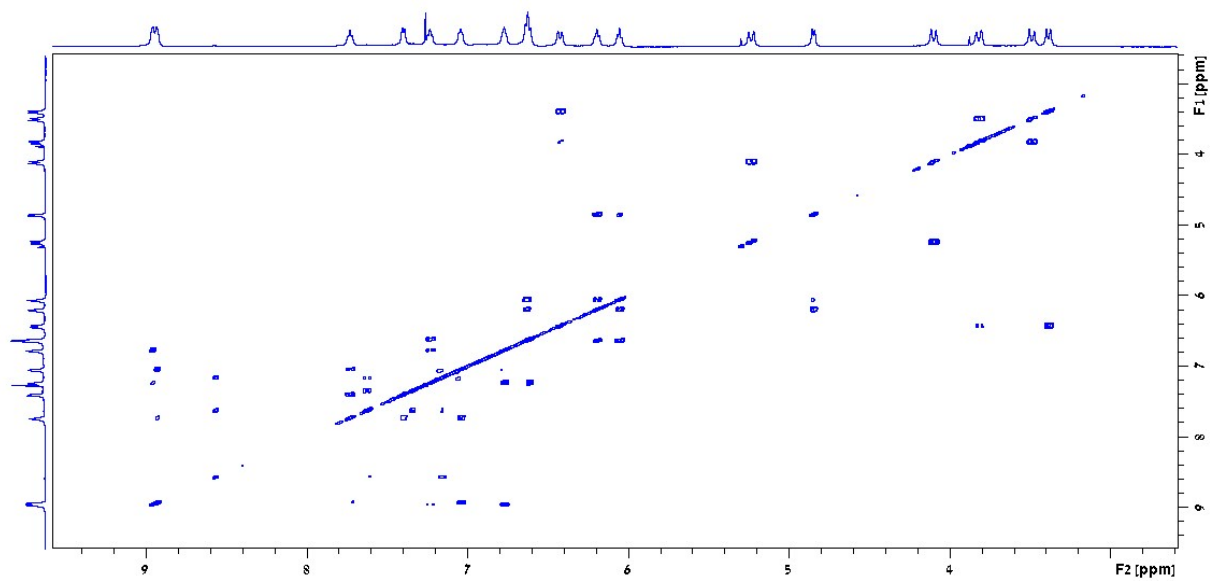

**Figure S17.**  $^1\text{H}$ - $^1\text{H}$  COSY NMR of  $[(\mu\text{-Lig}^1)\text{Mg-Cl}]_2$  ( $\text{CDCl}_3$ , 500MHz).

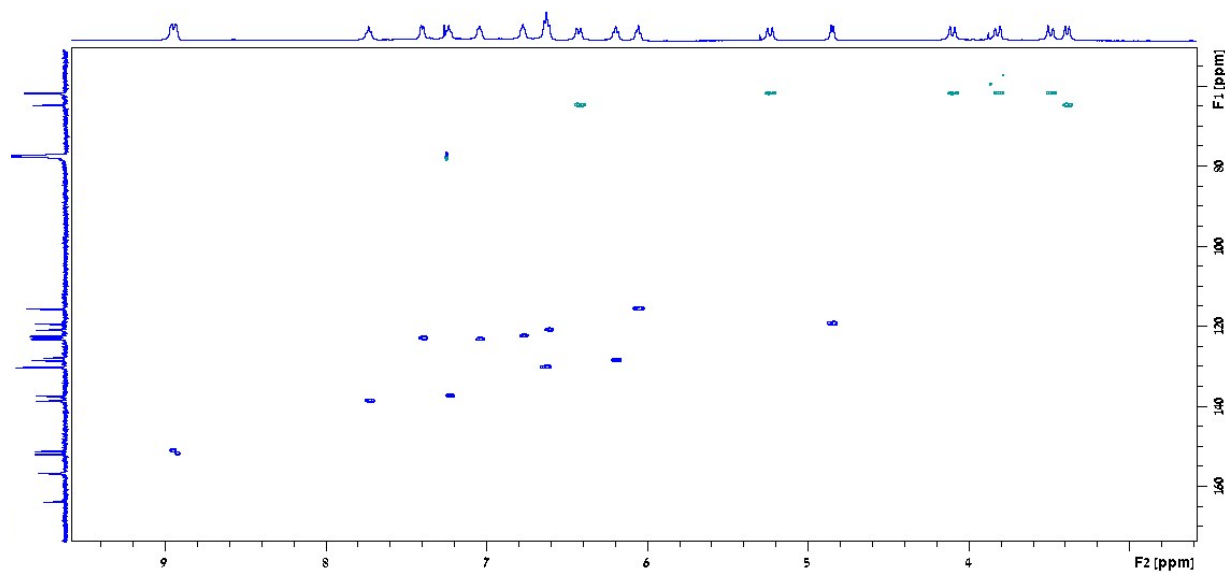

**Figure S18.**  $^1\text{H}$ - $^{13}\text{C}$  HSQC NMR of  $[(\mu\text{-Lig}^1)\text{Mg-Cl}]_2$  ( $\text{CDCl}_3$ , 500MHz).

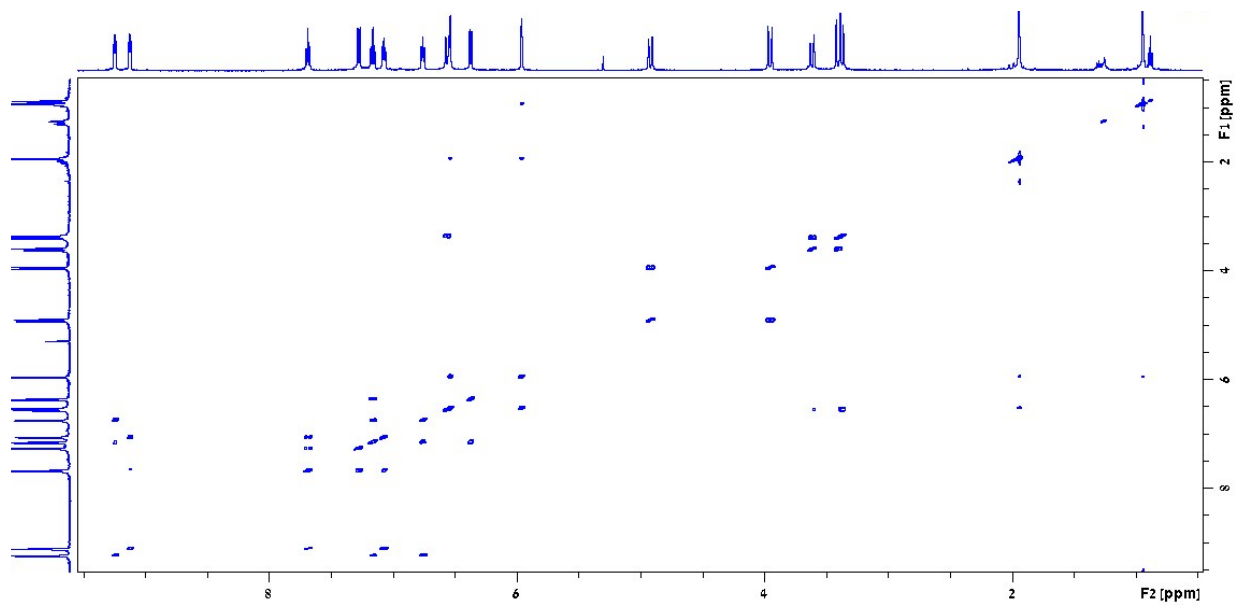

**Figure S19.**  $^1\text{H}$ - $^1\text{H}$  COSY NMR of  $[(\mu\text{-Lig}^2)\text{Mg-Cl}]_2$  ( $\text{CDCl}_3$ , 500MHz).

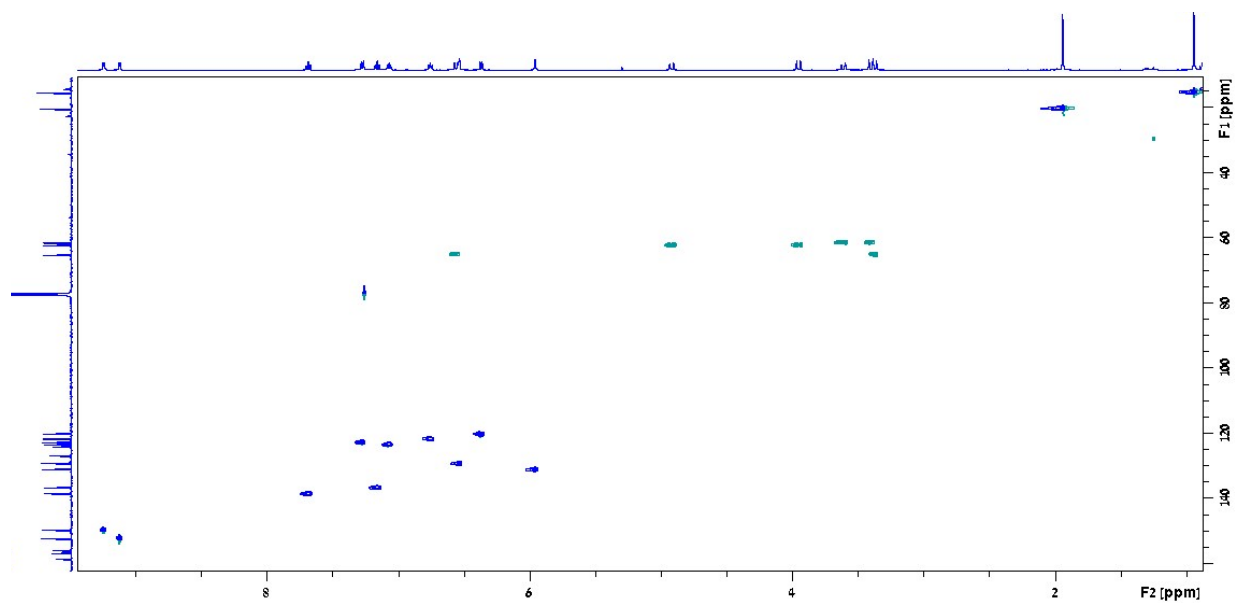

**Figure S20.**  $^1\text{H}$ - $^{13}\text{C}$  HSQC NMR of  $[(\mu\text{-Lig}^2)\text{Mg-Cl}]_2$  ( $\text{CDCl}_3$ , 500MHz).

## Crystallographic Structure of $[(\mu\text{-Lig}^2)\text{Mg-Cl}]_2$

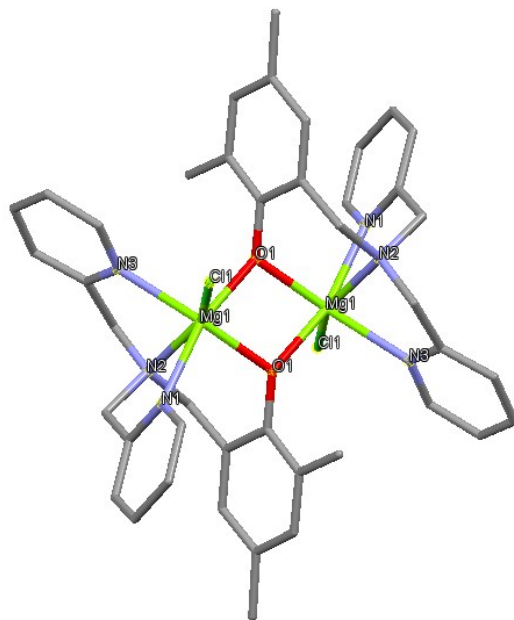

**Figure S21.** Molecular representation of the crystallographic structure of  $[(\mu\text{-Lig}^2)\text{Mg-Cl}]_2$ . Selected Bond lengths (Å) and angles (°): Mg(1)-O(1) 2.026(2), Mg(1)-O(1) 2.062 (3), Mg(1)-Cl(1) 2.443(2), Mg(1)-N(1) 2.287(3), Mg(1)-N(2) 2.325(1), Mg(1)-N(3) 2.223(2), O(1)-Mg(1)-Cl(1) 113.43(8), O(1)-Mg(1)-Cl(1) 96.54(8), O(1)-Mg(1)-N(1) 88.9(1), O(1)-Mg(1)-N(2) 86.5(1), O(1)-Mg(1)-N(3) 154.1(1), N(1)-Mg(1)-N(2) 74.1(1), N(1)-Mg(1)-N(3) 100.5(1), N(2)-Mg(1)-N(3) 73.2(1).

## Polymerization Results

**Table S1.** Polymerization of L-LA in dichloromethane at room temperature.<sup>a</sup>

| Entry | Initiator                            | [I]/[BnOH]/[LA] | Time (min) | Conv. <sup>b</sup> | $M_n$ calc <sup>c</sup> | $M_n$ <sup>d</sup> | PDI <sup>e</sup> |
|-------|--------------------------------------|-----------------|------------|--------------------|-------------------------|--------------------|------------------|
| 1.    | $[(\mu\text{-Lig}^1)\text{Mg-Cl}]_2$ | 1/1/300         | 15         | 0.90               | 38,880                  | 30,397             | 1.08             |
| 2.    | $[(\mu\text{-Lig}^1)\text{Mg-Cl}]_2$ | 1/2/600         | 20         | 0.91               | 39,312                  | 32,478             | 1.08             |
| 3.    | $[(\mu\text{-Lig}^1)\text{Mg-Cl}]_2$ | 1/10/1000       | 20         | 0.97               | 13,968                  | 15,023             | 1.05             |
| 4.    | $[(\mu\text{-Lig}^2)\text{Mg-Cl}]_2$ | 1/1/300         | 15         | 0.88               | 38,016                  | 39,150             | 1.07             |
| 5.    | $[(\mu\text{-Lig}^2)\text{Mg-Cl}]_2$ | 1/10/1000       | 20         | 0.90               | 12,960                  | 10,780             | 1.06             |
| 6.    | Lig <sup>3</sup> Mg-Cl               | 1/1/300         | 5          | 0.98               | 42,336                  | 33,940             | 1.04             |
| 7.    | Lig <sup>3</sup> Mg-Cl               | 1/10/1000       | 5          | 0.99               | 14,256                  | 13,860             | 1.04             |
| 8.    | Lig <sup>3</sup> Mg-Cl               | 1/1/1000        | 10         | 0.98               | 141,120                 | 86,597             | 1.06             |
| 9.    | Lig <sup>4</sup> Mg-Cl               | 1/1/300         | 2          | 0.98               | 42,336                  | 46,527             | 1.08             |
| 10.   | Lig <sup>4</sup> Mg-Cl               | 1/4/600         | 3          | 0.98               | 21,168                  | 20,155             | 1.04             |
| 11.   | Lig <sup>4</sup> Mg-Cl               | 1/1/1000        | 4          | 0.97               | 139,680                 | 111,510            | 1.05             |
| 12.   | Lig <sup>4</sup> Mg-Cl               | 1/10/1000       | 2          | 0.98               | 14,112                  | 13,540             | 1.04             |
| 13.   | Lig <sup>4</sup> Mg-Cl               | 1/1/2000        | 5          | 0.96               | 276,480                 | 271,452            | 1.06             |
| 14.   | Lig <sup>5</sup> Mg-Cl               | 1/1/300         | 5          | 0.95               | 41,040                  | 35,860             | 1.08             |
| 15.   | Lig <sup>5</sup> Mg-Cl               | 1/10/1000       | 10         | 0.95               | 13,680                  | 12,950             | 1.04             |
| 16.   | Lig <sup>5</sup> Mg-Cl               | 1/1/1000        | 10         | 0.91               | 131,140                 | 123,450            | 1.07             |
| 17.   | $[(\mu\text{-Lig}^1)\text{Mg-Cl}]_2$ | 1/0/300         | 15         | 0.42               | 18,144                  | 27,369             | 1.20             |
| 18.   | $[(\mu\text{-Lig}^2)\text{Mg-Cl}]_2$ | 1/0/300         | 15         | 0.87               | 37,584                  | 103,378            | 1.27             |
| 19.   | Lig <sup>3</sup> Mg-Cl               | 1/0/300         | 5          | 0.93               | 40,176                  | 309,139            | 1.26             |
| 20.   | Lig <sup>4</sup> Mg-Cl               | 1/0/300         | 10         | 0.93               | 40,176                  | 297,372            | 1.20             |
| 21.   | Lig <sup>5</sup> Mg-Cl               | 1/0/300         | 5          | 0.88               | 38,016                  | 211,172            | 1.35             |

[a] The polymerizations were performed in CH<sub>2</sub>Cl<sub>2</sub> (5mL) employing 10 μmol of catalyst. [b] Determined by <sup>1</sup>H NMR spectroscopy (500 MHz). [c] Calculated from monomer conversion assuming full benzyl alcohol participation or full catalyst activation. Values are given in g mol<sup>-1</sup> [d]  $M_n$  was determined by GPC analysis with THF as eluent calibrated with polystyrene standards and multiplied by a correction factor of 0.58. [e] PDI: polydispersity index ( $M_w/M_n$ ). Determined by GPC analysis.

**Table S2.** Preparation of stereoblock PLA copolymers by sequential addition of L-LA and D-LA.<sup>a</sup>

| Entry | Initiator              | Type        | Composition                                                  | Time (min) <sup>b</sup> | Conv. <sup>c</sup> | P <sub>m</sub> <sup>d</sup> | M <sub>n calc</sub> <sup>e</sup> | M <sub>n</sub> <sup>f</sup> | PDI <sup>g</sup> |
|-------|------------------------|-------------|--------------------------------------------------------------|-------------------------|--------------------|-----------------------------|----------------------------------|-----------------------------|------------------|
| 1.    | Lig <sup>3</sup> Mg-Cl | Di Block    | L(100)- <i>b</i> -D(100)                                     | 10                      | >0.98              | >0.99                       | 28800                            | 26700                       | 1.11             |
| 2.    | Lig <sup>3</sup> Mg-Cl | Di Block    | L(200)- <i>b</i> -D(200)                                     | 10                      | >0.98              | >0.99                       | 57600                            | 62670                       | 1.20             |
| 3.    | Lig <sup>3</sup> Mg-Cl | Di Block    | L(300)- <i>b</i> -D(300)                                     | 20                      | >0.98              | >0.99                       | 86400                            | 66480                       | 1.34             |
| 4.    | Lig <sup>4</sup> Mg-Cl | Di Block    | L(100)- <i>b</i> -D(100)                                     | 10                      | >0.98              | >0.99                       | 28800                            | 22900                       | 1.06             |
| 5.    | Lig <sup>4</sup> Mg-Cl | Di Block    | L(200)- <i>b</i> -D(200)                                     | 10                      | >0.98              | >0.99                       | 57600                            | 62900                       | 1.04             |
| 6.    | Lig <sup>4</sup> Mg-Cl | Di Block    | L(300)- <i>b</i> -D(300)                                     | 11                      | >0.98              | >0.99                       | 86400                            | 85800                       | 1.04             |
| 7.    | Lig <sup>4</sup> Mg-Cl | Di Block    | L(400)- <i>b</i> -D(400)                                     | 12                      | >0.98              | >0.99                       | 115200                           | 113670                      | 1.06             |
| 8.    | Lig <sup>4</sup> Mg-Cl | Di Block    | L(500)- <i>b</i> -D(500)                                     | 13                      | >0.98              | >0.99                       | 144000                           | 149110                      | 1.07             |
| 9.    | Lig <sup>4</sup> Mg-Cl | Di Block    | L(800)- <i>b</i> -D(800)                                     | 20                      | >0.98              | >0.99                       | 228100                           | 202300                      | 1.09             |
| 10.   | Lig <sup>4</sup> Mg-Cl | Tri Block   | L(100)- <i>b</i> -D(100)- <i>b</i> -L(100)                   | 15                      | >0.98              | 0.98                        | 43200                            | 45860                       | 1.08             |
| 11.   | Lig <sup>4</sup> Mg-Cl | Tri Block   | L(200)- <i>b</i> -D(200)- <i>b</i> -L(200)                   | 16                      | >0.98              | 0.98                        | 86400                            | 88940                       | 1.13             |
| 12.   | Lig <sup>4</sup> Mg-Cl | Tri Block   | L(300)- <i>b</i> -D(300)- <i>b</i> -L(300)                   | 18                      | >0.98              | 0.98                        | 129600                           | 120590                      | 1.12             |
| 13.   | Lig <sup>4</sup> Mg-Cl | Tetra Block | L(100)- <i>b</i> -D(100)- <i>b</i> -L(100)- <i>b</i> -L(100) | 22                      | >0.98              | 0.97                        | 57600                            | 64690                       | 1.10             |
| 14.   | Lig <sup>4</sup> Mg-Cl | Tetra Block | L(200)- <i>b</i> -D(200)- <i>b</i> -L(200)- <i>b</i> -L(200) | 24                      | >0.98              | 0.96                        | 115200                           | 104230                      | 1.13             |
| 15.   | Lig <sup>4</sup> Mg-Cl | Tetra Block | L(300)- <i>b</i> -D(300)- <i>b</i> -L(300)- <i>b</i> -L(300) | 24                      | >0.98              | 0.96                        | 172800                           | 166100                      | 1.10             |

[a] The polymerizations were performed in CH<sub>2</sub>Cl<sub>2</sub> (5mL) employing 10 μmol of catalyst and 2 equiv of BnOH. [b] Total polymerization time given in minutes. 5-15 min were maintained between each monomer addition, depending on the monomer amount and length of polymer chain. [c] Determined by <sup>1</sup>H NMR spectroscopy (500 MHz). [d] P<sub>meso</sub>: the probability of a *meso* linkage between lactide units. Determined by the <sup>1</sup>H homonuclear-decoupled NMR spectrometry (CDCl<sub>3</sub>, 500 MHz) and by <sup>13</sup>C NMR (CDCl<sub>3</sub>, 125MHz). [e] Calculated from monomer conversion assuming full benzyl alcohol participation. Values are given in g mol<sup>-1</sup> [f] M<sub>n</sub> was determined by GPC analysis with CHCl<sub>3</sub> as eluent calibrated with polystyrene standards and multiplied by a correction factor of 0.58. [g] PDI: polydispersity index (M<sub>w</sub>/M<sub>n</sub>). Determined by GPC analysis.

## $^1\text{H}$ Homonuclear Decoupled NMR and $^{13}\text{C}$ NMR of PLA Samples

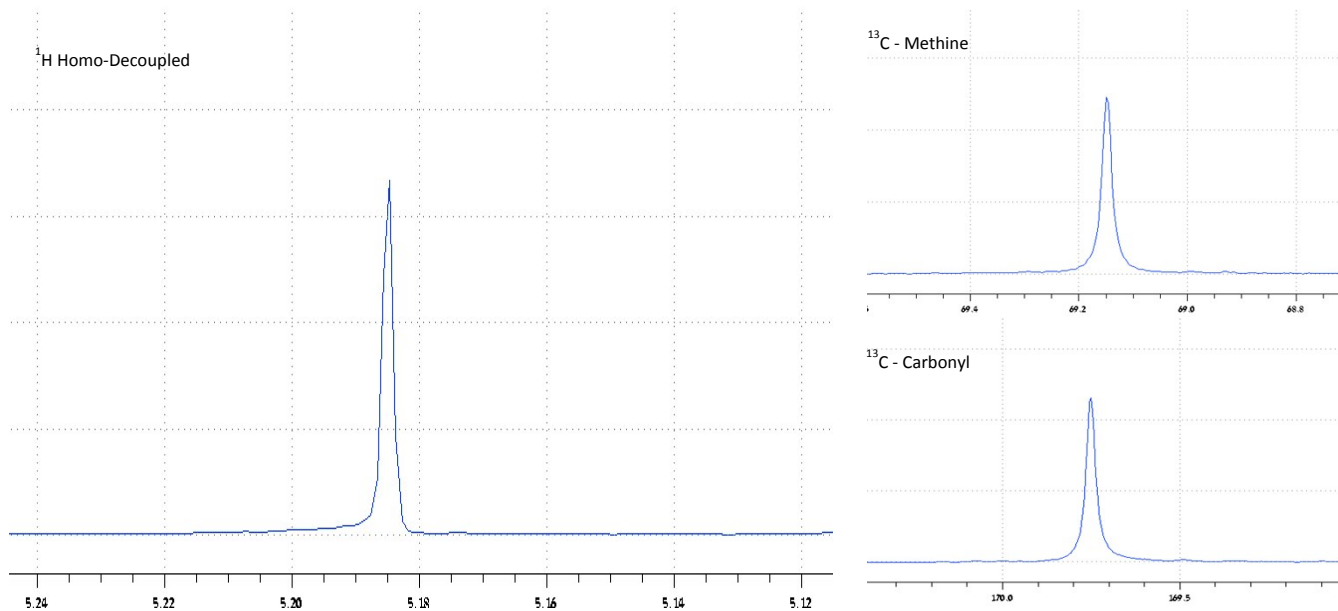

**Figure S22.**  $^1\text{H}$  HD NMR ( $\text{CDCl}_3$ , 500 MHz) and  $^{13}\text{C}$  NMR ( $\text{CDCl}_3$ , 125 MHz) of a homopolymer PLLA sample ( $M_n=46500 \text{ g mol}^{-1}$ ) obtained with  $\text{Lig}^4\text{Mg-Cl}$ .

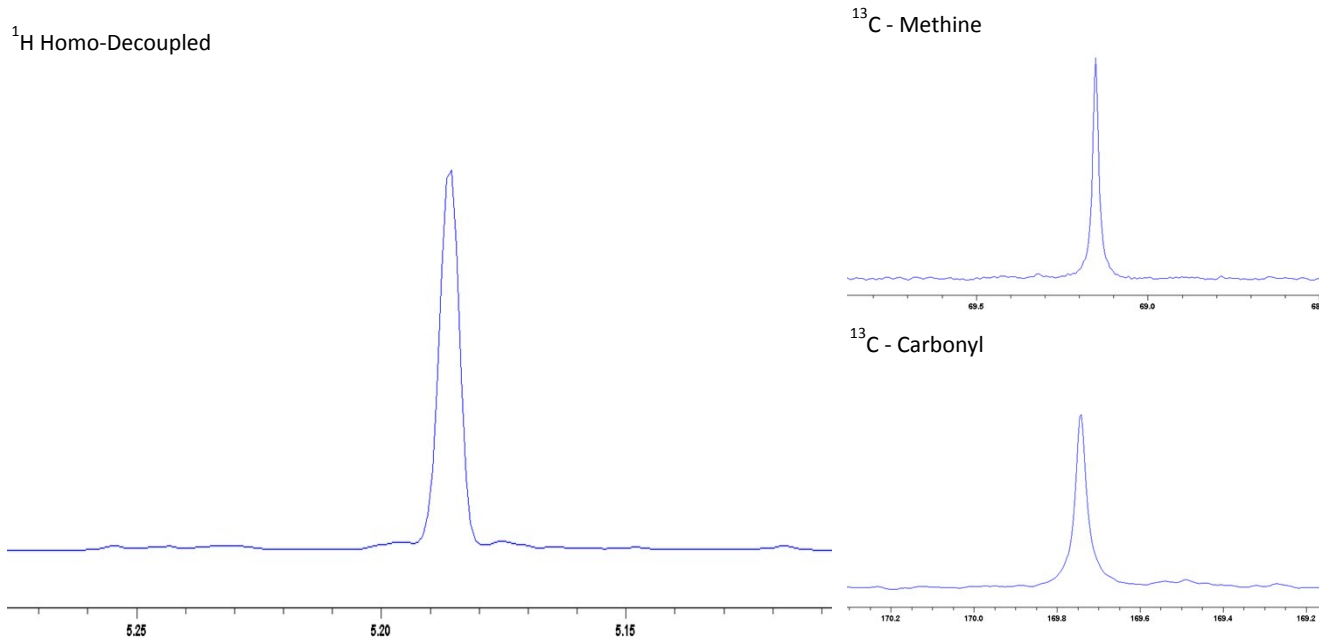

**Figure S23.**  $^1\text{H}$  HD NMR ( $\text{CDCl}_3$ , 500 MHz) and  $^{13}\text{C}$  NMR ( $\text{CDCl}_3$ , 125 MHz) of L100-*b*-D100 di-block PLA copolymer sample obtained with  $\text{Lig}^4\text{Mg-Cl}$ .



$^1\text{H}$  Homo-Decoupled

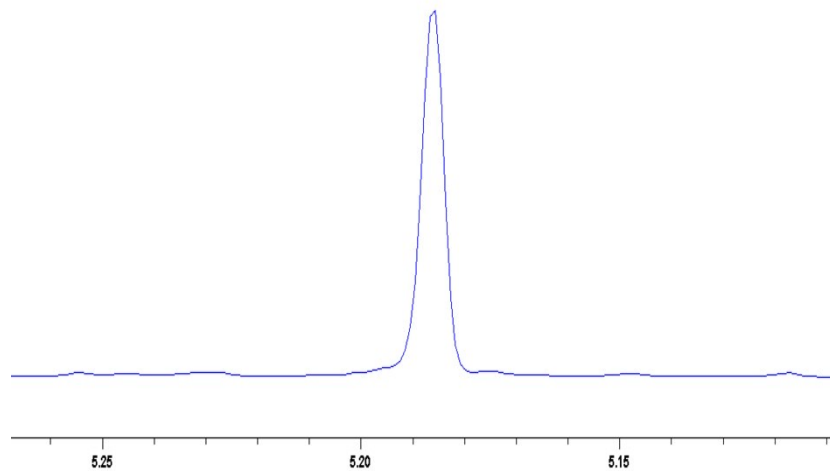

$^{13}\text{C}$  - Methine

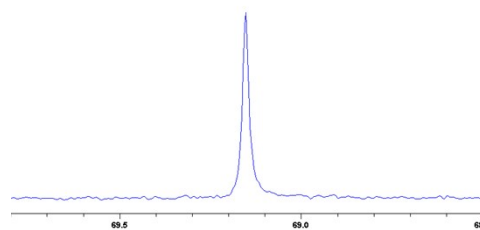

$^{13}\text{C}$  - Carbonyl

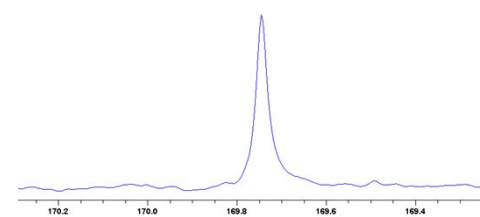

**Figure S24.**  $^1\text{H}$  HD NMR ( $\text{CDCl}_3$ , 500 MHz) and  $^{13}\text{C}$  NMR ( $\text{CDCl}_3$ , 125 MHz) of L200-*b*-D200 di-block PLA copolymer sample obtained with  $\text{Lig}^4\text{Mg-Cl}$ .

$^1\text{H}$  Homo-Decoupled

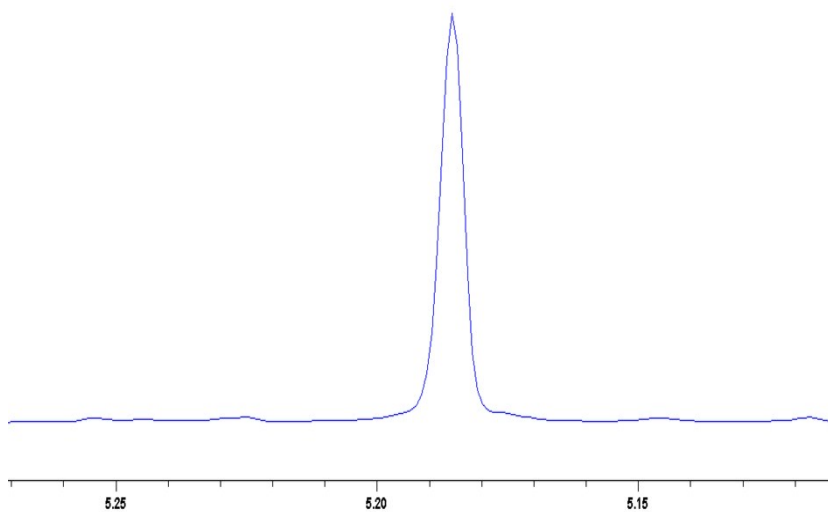

$^{13}\text{C}$  - Methine

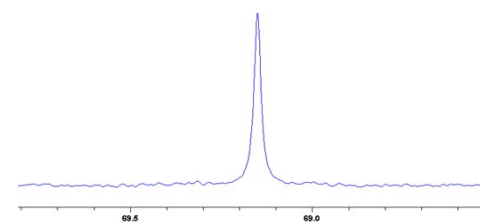

$^{13}\text{C}$  - Carbonyl

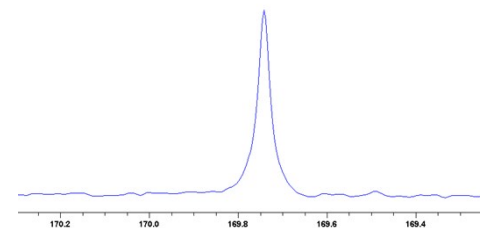

**Figure S25.**  $^1\text{H}$  HD NMR ( $\text{CDCl}_3$ , 500 MHz) and  $^{13}\text{C}$  NMR ( $\text{CDCl}_3$ , 125 MHz) of L300-*b*-D300 di-block PLA copolymer sample obtained with  $\text{Lig}^4\text{Mg-Cl}$ .

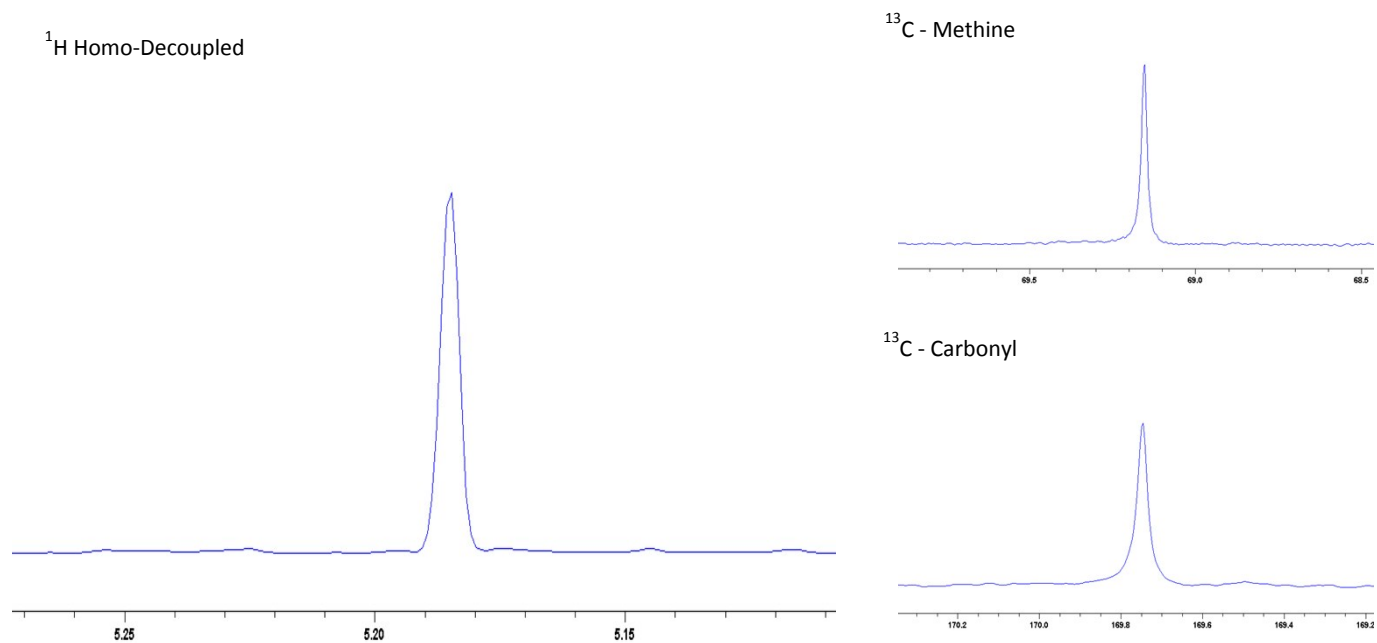

**Figure S26.**  $^1\text{H}$  HD NMR ( $\text{CDCl}_3$ , 500 MHz) and  $^{13}\text{C}$  NMR ( $\text{CDCl}_3$ , 125 MHz) of L500-*b*-D500 di-block PLA copolymer sample obtained with  $\text{Lig}^4\text{Mg-Cl}$ .

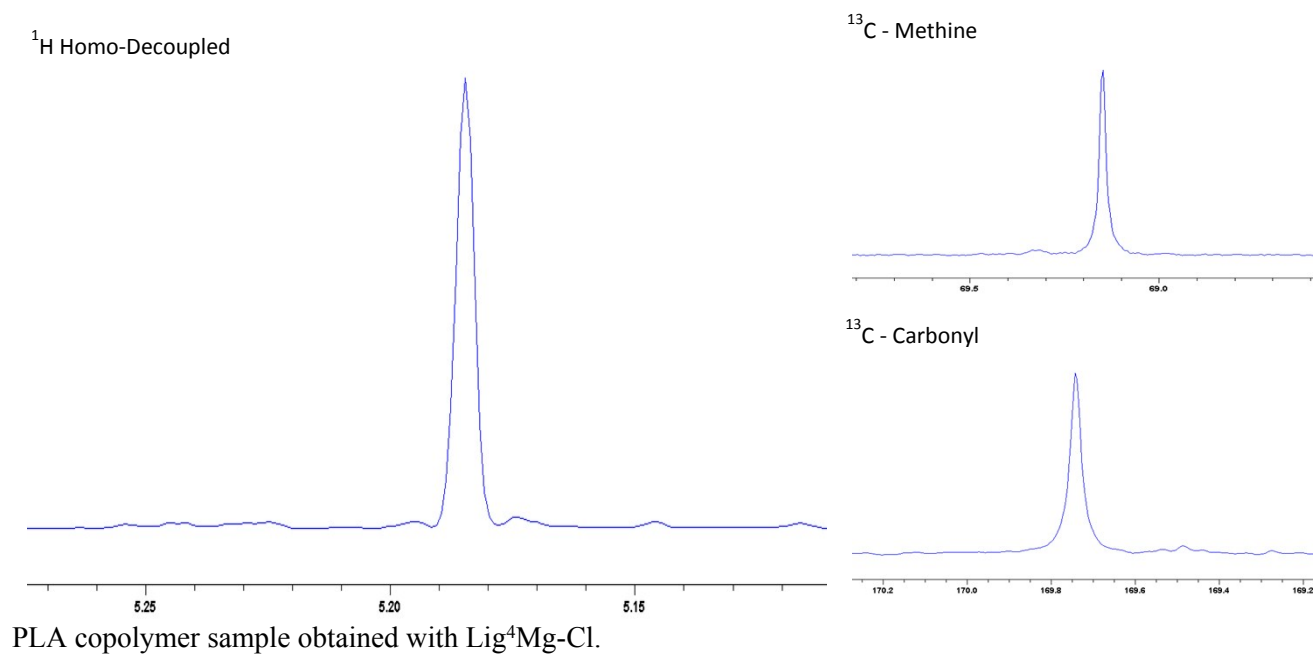

**Figure S27.**  $^1\text{H}$  HD NMR ( $\text{CDCl}_3$ , 500 MHz) and  $^{13}\text{C}$  NMR ( $\text{CDCl}_3$ , 125 MHz) of L100-*b*-D100-*b*-L100 tri-block PLA copolymer sample obtained with  $\text{Lig}^4\text{Mg-Cl}$ .

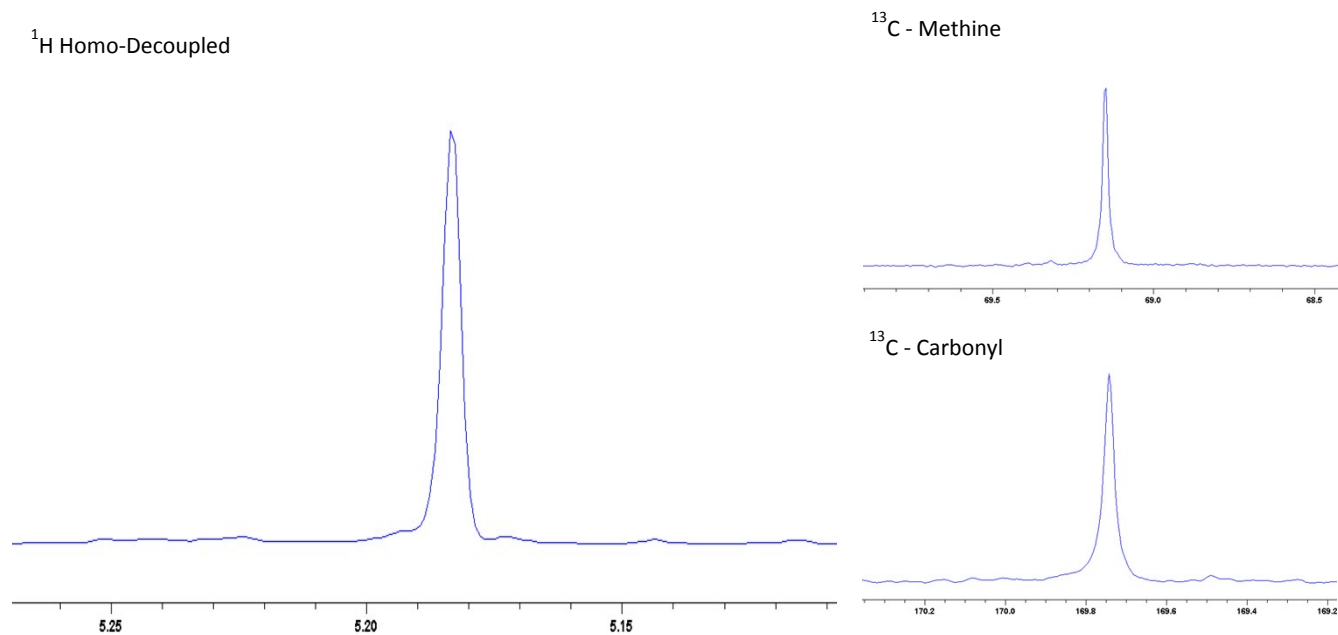

**Figure S28.**  $^1\text{H}$  HD NMR ( $\text{CDCl}_3$ , 500 MHz) and  $^{13}\text{C}$  NMR ( $\text{CDCl}_3$ , 125 MHz) of L200-*b*-D200-*b*-L200 tri-block PLA copolymer sample obtained with  $\text{Lig}^4\text{Mg-Cl}$ .

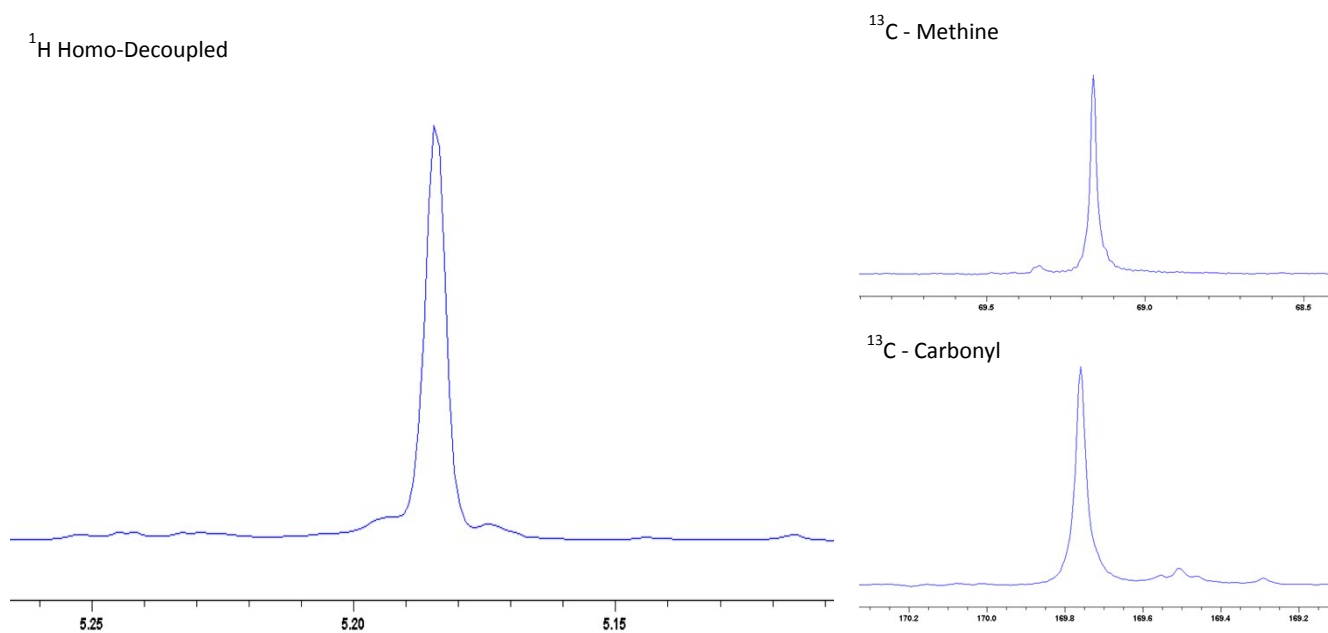

**Figure S29.**  $^1\text{H}$  HD NMR ( $\text{CDCl}_3$ , 500 MHz) and  $^{13}\text{C}$  NMR ( $\text{CDCl}_3$ , 125 MHz) of L100-*b*-D100-*b*-L100-*b*-D100 tetra-block PLA copolymer sample obtained with  $\text{Lig}^4\text{Mg-Cl}$ .

## Thermal and WAXD Analysis of Stereo-*n*-Block PLA Samples

*Thermal and WAXD analysis of stereo-diblocks*

**Table S3.** DSC analysis of stereo-diblocks.

| Initiator                  | Composition              | First run |              | Cooling |              | Second run |                  |       |              |
|----------------------------|--------------------------|-----------|--------------|---------|--------------|------------|------------------|-------|--------------|
|                            |                          | $T_m$     | $\Delta H_m$ | $T_c$   | $\Delta H_c$ | $T_g$      | $T_c/\Delta H_c$ | $T_m$ | $\Delta H_m$ |
| $\text{Lig}^3\text{Mg-Cl}$ | L(100)- <i>b</i> -D(100) | 213       | 75           | 140     | 58           | 56         | -                | 212   | 58           |
| $\text{Lig}^3\text{Mg-Cl}$ | L(200)- <i>b</i> -D(200) | 213       | 64           | 117     | 47           | 56         | -                | 211   | 48           |
| $\text{Lig}^4\text{Mg-Cl}$ | L(100)- <i>b</i> -D(100) | 212       | 59           | 132     | 46           | 58         | -                | 210   | 42           |
| $\text{Lig}^4\text{Mg-Cl}$ | L(200)- <i>b</i> -D(200) | 211       | 66           | 135     | 52           | 62         | -                | 213   | 50           |
| $\text{Lig}^4\text{Mg-Cl}$ | L(300)- <i>b</i> -D(300) | 214       | 76           | 127     | 49           | 58         | -                | 205   | 51           |
| $\text{Lig}^4\text{Mg-Cl}$ | L(400)- <i>b</i> -D(400) | 210       | 87           | 139     | 60           | 59         | 106/7            | 213   | 61           |
| $\text{Lig}^4\text{Mg-Cl}$ | L(500)- <i>b</i> -D(500) | 214       | 79           | 153     | 54           | 58         | 101/3            | 211   | 51           |
| $\text{Lig}^4\text{Mg-Cl}$ | L(800)- <i>b</i> -D(800) | 214       | 67           | 154     | 43           | 57         | -                | 216   | 44           |

$T$  ( $^{\circ}\text{C}$ );  $\Delta H$  (J/g)

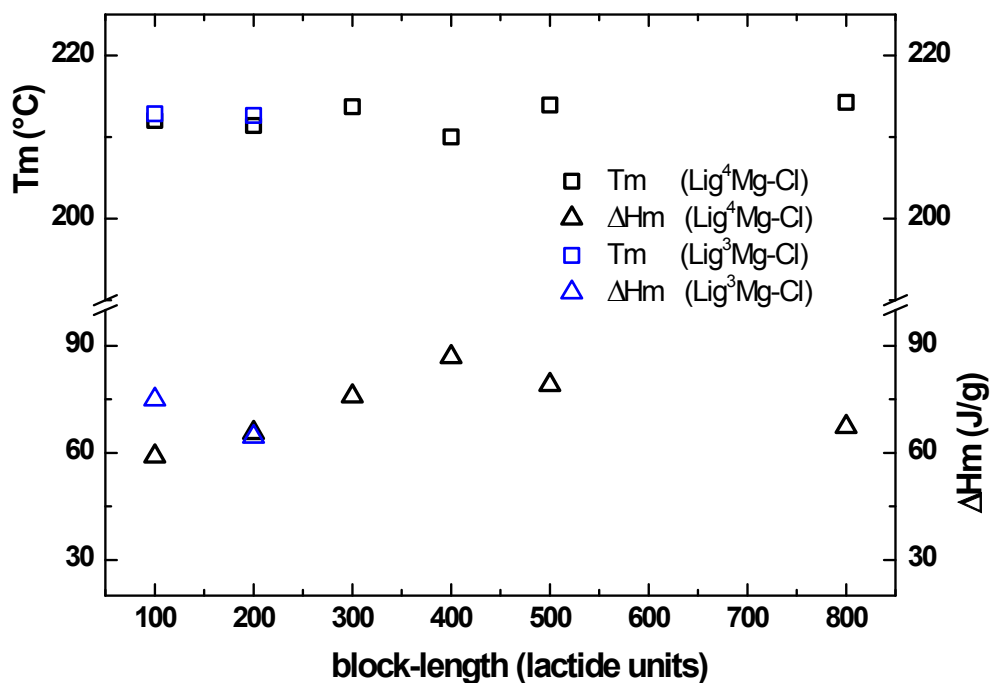

**Figure S30.**  $T_m$  and  $\Delta H_m$  vs. block length (first DSC heating run) of stereo-diblocks.

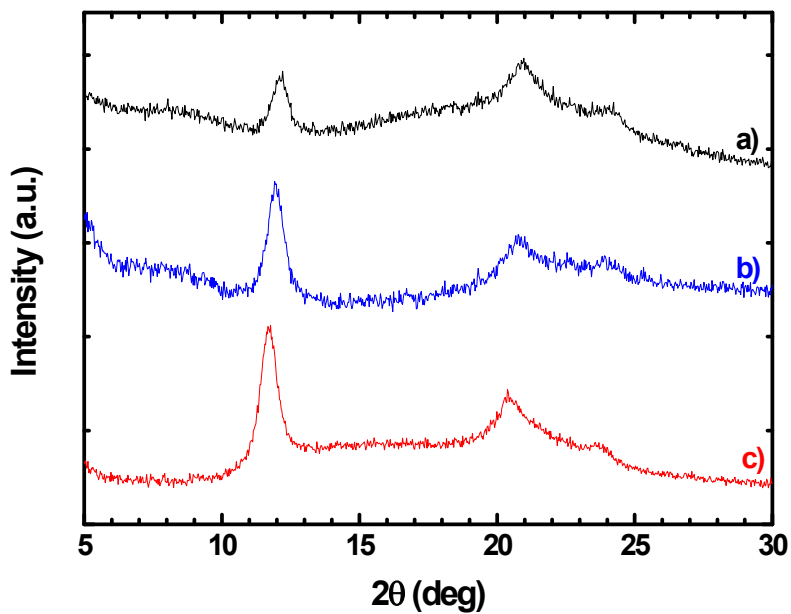

**Figure S31.** WAXD patterns of stereo-diblocks having a) 100 (black), b) 300 (blue) and c) 800 (red) *mer* block lengths. All samples were in form of DCM casting film.

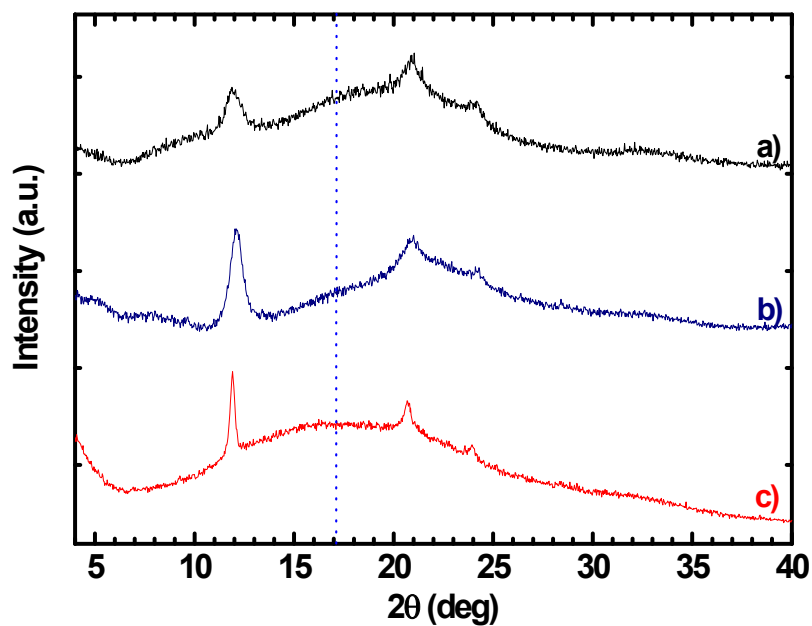

**Figure S32.** WAXD patterns of stereo-diblocks L(800)-*b*-D(800) crystallized from a) polymerization solution, b) DCM solution, c) melt during DSC cooling run.

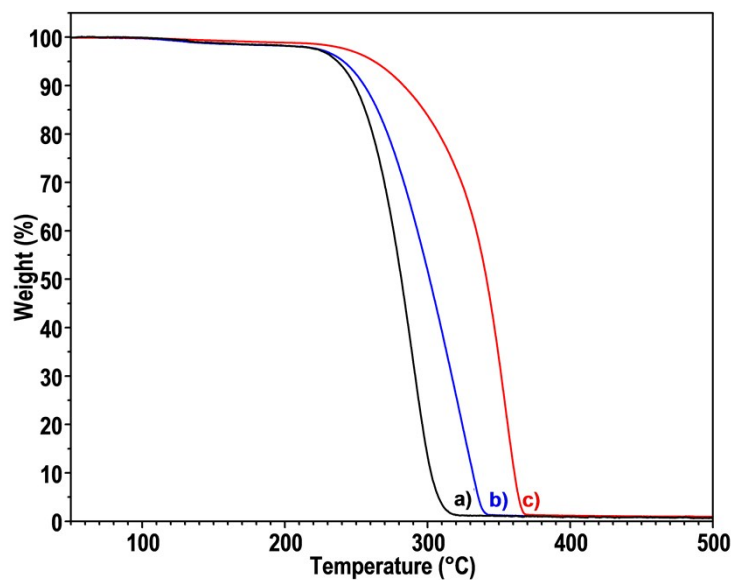

**Figure S33.** Thermogravimetric curves of stereo-diblock copolymers having a) 100 (black), b) 300 (blue) and c) 800 (red) *mer* block lengths. All samples were crystallized from polymerization solution (“as-polymerized” samples).

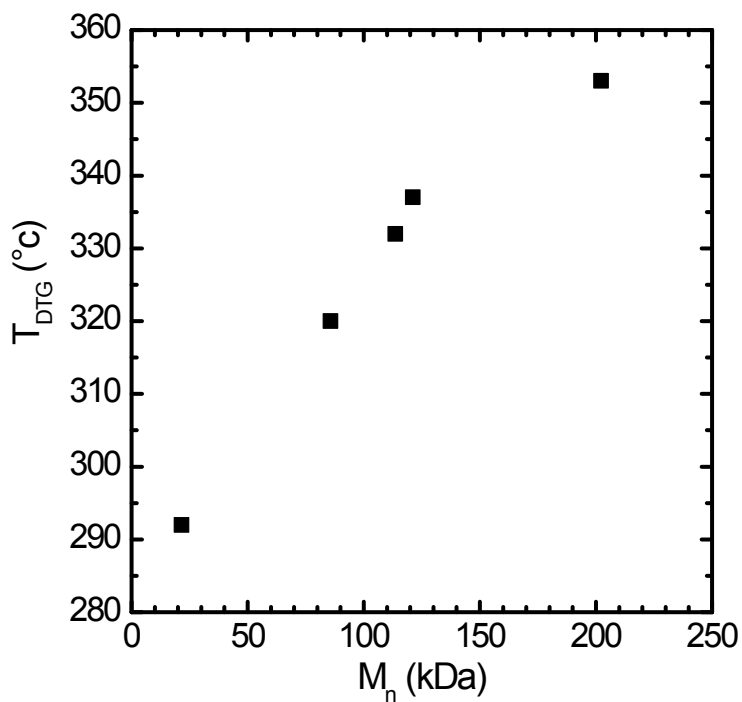

**Figure S34.** Degradation temperature ( $T_{DTG}$ ) vs  $M_n$  (see Table S2), for stereo-diblock copolymers having 100-800 mer block length.

**Table S4.** Degradation temperatures of stereo-diblocks and high MW PLLA and PDLA homopolymers blend.

| Initiator              | Composition                              | $M_n$ (kDa) | $T_{\text{weight loss 5\%}}$ | $T_{\text{weight loss 10\%}}$ | $T_{\text{onset}}$ | $T_{DTG}$ |
|------------------------|------------------------------------------|-------------|------------------------------|-------------------------------|--------------------|-----------|
| Lig <sup>3</sup> Mg-Cl | L(100)- <i>b</i> -D(100)                 | 24          | 236                          | 249                           | 256                | 290       |
| Lig <sup>4</sup> Mg-Cl | L(300)- <i>b</i> -D(300)                 | 86          | 240                          | 255                           | 267                | 320       |
| Lig <sup>4</sup> Mg-Cl | L(400)- <i>b</i> -D(400)                 | 114         | 237                          | 257                           | 267                | 334       |
| Lig <sup>4</sup> Mg-Cl | L(300)- <i>b</i> -D(300)                 | 121         | 242                          | 260                           | 279                | 344       |
| Lig <sup>4</sup> Mg-Cl | L(800)- <i>b</i> -D(800)                 | 202         | 262                          | 284                           | 319                | 354       |
| Lig <sup>4</sup> Mg-Cl | L(1000)- <i>b</i> -D(1000)               | 321         | 281                          | 300                           | 325                | 357       |
|                        | PLLA (185KDa) and PDLA (230 KDa) 1:1 mix | 208         | nd                           | nd                            | 341                | 361       |

nd – not detected

Thermal and WAXD analysis of stereo-tri- and tetrablock copolymers

Table S5. DSC analysis of stereo-triblocks.

| Initiator              | Composition                                | First run |              | Cooling |              | Second run |                  |       |              |
|------------------------|--------------------------------------------|-----------|--------------|---------|--------------|------------|------------------|-------|--------------|
|                        |                                            | $T_m$     | $\Delta H_m$ | $T_c$   | $\Delta H_c$ | $T_g$      | $T_c/\Delta H_c$ | $T_m$ | $\Delta H_m$ |
| Lig <sup>4</sup> Mg-Cl | L(100)- <i>b</i> -D(100)- <i>b</i> -L(100) | 202       | 36           | 106     | 4            | 55         | 99/25            | 196   | 29           |
| Lig <sup>4</sup> Mg-Cl | L(200)- <i>b</i> -D(200)- <i>b</i> -L(200) | 205       | 41           | 115     | 23           | 58         | 98/12.5          | 200   | 33           |
| Lig <sup>4</sup> Mg-Cl | L(300)- <i>b</i> -D(300)- <i>b</i> -L(300) | 201       | 40           | 108     | 11           | 58         | 101/21.3         | 197   | 31           |

T (°C);  $\Delta H$  (J/g)

Table S6. DSC data of stereo-tetrablocks.

| Initiator              | Composition                                                  | First run |              | Cooling |              | Second run |                  |       |              |
|------------------------|--------------------------------------------------------------|-----------|--------------|---------|--------------|------------|------------------|-------|--------------|
|                        |                                                              | $T_m$     | $\Delta H_m$ | $T_c$   | $\Delta H_c$ | $T_g$      | $T_c/\Delta H_c$ | $T_m$ | $\Delta H_m$ |
| Lig <sup>4</sup> Mg-Cl | L(100)- <i>b</i> -D(100)- <i>b</i> -L(100)- <i>b</i> -D(100) | 202       | 49           | 115     | 22           | 59         | 97/21            | 204   | 43           |
| Lig <sup>4</sup> Mg-Cl | L(200)- <i>b</i> -D(200)- <i>b</i> -L(200)- <i>b</i> -D(200) | 205       | 56           | 119     | 37           | 57         | 97/9             | 201   | 39           |
| Lig <sup>4</sup> Mg-Cl | L(300)- <i>b</i> -D(300)- <i>b</i> -L(300)- <i>b</i> -D(300) | 179       | 18           | -       | -            | 57         | 140/5            | 185   | 6            |

T (°C);  $\Delta H$  (J/g)

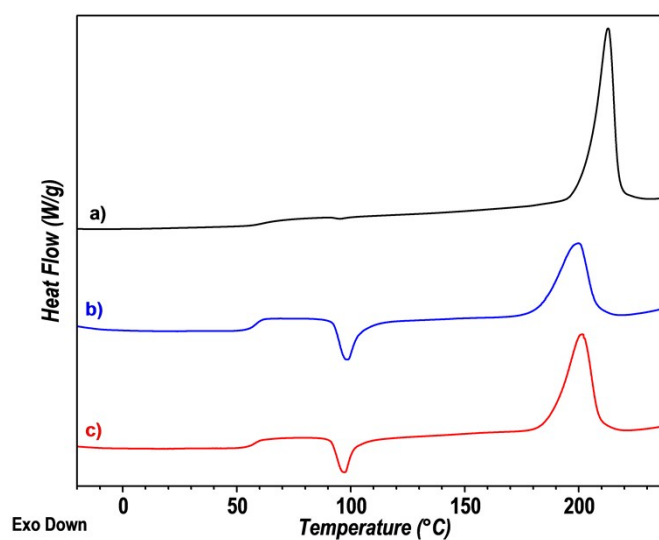

Figure S35. Thermograms of second DSC heating run of stereo- di (a), tri (b), and tetra-blocks (c) having 200 *mer* block length.



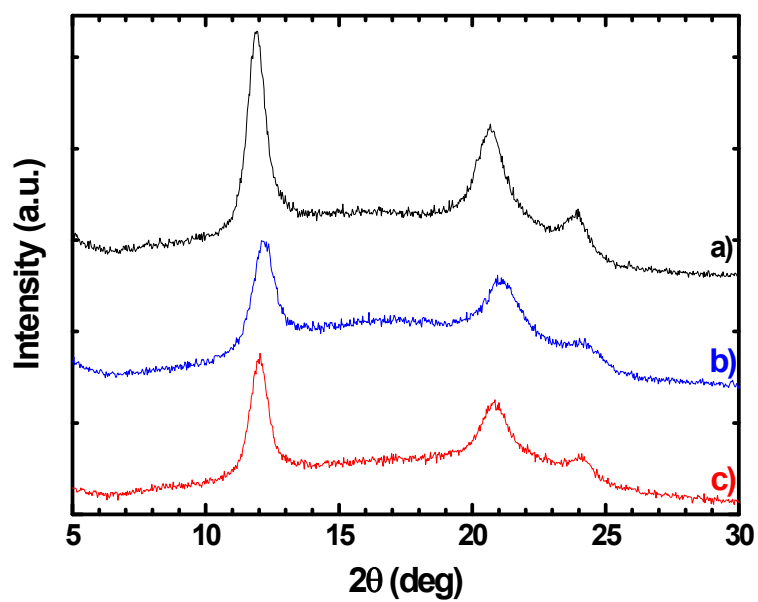

**Figure S36.** WAXD patterns of stereo a) di (black), b) tri (blue) and c) tetra blocks (red) samples having 200 *mer* block length. All samples were crystallized from polymerization solution (“as-polymerized” samples).

## References

- S1. (a) K. Gademann, D.E. Chavez, E.N. Jacobsen, *Angew. Chem. Int. Ed.*, 2002, **41**, 3059-3061. (b) A.I. Kochnev, I.I. Oleynik, I.V. Oleynik, S.S. Ivanchev, G.A. Tolstikov, *Russ. Chem. Bull. Int. Ed.*, 2007, **56**, 1125-1129. (c) D.D. Cox, L. Que, *J. Am. Chem. Soc.*, 1988, **110**, 8085-8092. (d) M.J.L. Tschan, J. Guo, S.K. Raman, E. Brule, T. Roisnel, M.N. Rager, R. Legay, G. Durieux, B. Rigaud, C.M. Thomas, *Dalton Trans.*, 2014, **43**, 4550-4564.
- S2. G.P. Connor, K.J. Mayer, C.S. Tribble, W.R. McNamara, *Inorg. Chem.*, 2014, **53**, 5408-5410.
- S3. (a) Stopper, A.; Okuda, J.; Kol, M. *Macromolecules* **2012**, 45, 698-704. (b) Thakur, K. A. M.; Kean, R. T.; Hall, E. S.; Kolstad, J. J.; Lindgren, T. A.; Doscotch, M. A.; Siepmann, J. I.; Munson, E. S. *Macromolecules* **1997**, 30, 2422-2428. (c) Chamberlain, B. M.; Cheng, M.; Moore, D. R.; Ovitt, T. M.; Lobkovsky, E. B.; Coates, G. W. *J. Am. Chem. Soc.* **2001**, 123, 3229-3238. (d) Zell, M. T.; Padden, B. E.; Paterick, A. J.; Thakur, K. A. M.; Kean, R. T.; Hillmyer, M. A.; Munson, E. J. *Macromolecules* **2002**, 35, 7700-7707.
